# Comparative physiology reveals heat stress disrupts acid-base homeostasis independent of symbiotic state in the model cnidarian *Exaiptasia diaphana*

Luella Allen-Waller, Katelyn G. Jones, Marcelina P. Martynek, Kristen T. Brown, Katie L. Barott\*

Department of Biology, University of Pennsylvania, Philadelphia, PA 19104 USA

\*Corresponding author: kbarott@sas.upenn.edu

**Keywords:** intracellular pH, thermal stress, Aiptasia, symbiosis, climate change, Symbiodiniaceae

## SUMMARY STATEMENT

Warming oceans threaten marine invertebrates. We found that heat disrupts acid-base homeostasis in a model symbiotic sea anemone regardless of symbiont presence or function, highlighting bleaching-independent effects of climate change.

## ABSTRACT

Climate change threatens symbiotic cnidarians' survival by causing photosymbiosis breakdown in a process known as bleaching. Direct effects of temperature on cnidarian host physiology remain difficult to describe because heatwaves depress symbiont performance, leading to host stress and starvation. The symbiotic sea anemone *Exaiptasia diaphana* provides an opportune system to disentangle direct vs. indirect heat effects on the host, since it can survive indefinitely without symbionts. We tested the hypothesis that heat directly impairs cnidarian physiology by comparing symbiotic and aposymbiotic individuals of two laboratory subpopulations of a commonly used clonal strain of *E. diaphana*, CC7. We exposed anemones to a range of temperatures (ambient, +2°C, +4°C, +6°C) for 15–18 days, then measured their symbiont population densities, autotrophic carbon assimilation and translocation, photosynthesis, respiration, and host intracellular pH (pH<sub>i</sub>). Symbiotic anemones from the two subpopulations

differed in size and symbiont density and exhibited distinct heat stress responses, highlighting the importance of acclimation to different laboratory conditions. Specifically, the cohort with higher initial symbiont densities experienced dose-dependent symbiont loss with increasing temperature and a corresponding decline in host photosynthate accumulation. In contrast, the cohort with lower initial symbiont densities did not lose symbionts or assimilate less photosynthate when heated, similar to the response of aposymbiotic anemones. However, anemone  $\text{pH}_i$  decreased at higher temperatures regardless of cohort, symbiont presence, or photosynthate translocation, indicating that heat consistently disrupts cnidarian acid-base homeostasis independent of symbiotic status or mutualism breakdown. Thus, pH regulation may be a critical vulnerability for cnidarians in a changing climate.

## INTRODUCTION

The world's oceans have absorbed 93% of excess planetary heat from anthropogenic climate change (Johnson and Lyman, 2020), threatening the survival of sessile marine organisms that cannot migrate to cooler climates to avoid increasingly frequent and severe marine heatwaves (Atkins and Travis, 2010; Kim et al., 2023; Smith et al., 2023). Marine heatwaves have already decimated populations of keystone invertebrates, including notable losses of reef-building corals (scleractinians) (Hughes et al., 2017; Hughes et al., 2018). Predicting how climate change will affect marine invertebrate populations is complicated by the fact that many species, including reef-building coral, engage in symbiotic relationships with microbial symbionts (e.g. dinoflagellates, fungi, bacteria), whose effect on host environmental response we are only beginning to understand (Apprill, 2020; McFall-Ngai et al., 2013). Symbiosis can facilitate physiological adaptation, as partner switching or 'symbiont shuffling' can provide mechanisms besides genetic evolution by which organisms can adapt to changing surroundings (Cunning et al., 2015b; Toby Kiers et al., 2010). Yet the interdependence between partners can also magnify mutualistic organisms' environmental sensitivities, as both species must maintain function together under new conditions (Apprill, 2020; Bénard et al., 2020; Goulet and Goulet, 2021). We therefore need to be precise in our understanding of when an abiotic stressor like elevated temperature is affecting a host, its symbiont(s), both partners, or even modifying the dynamics of the interaction itself.

Direct effects of abiotic stress on many symbiotic invertebrates remain uncharacterized because environmental change can also have indirect consequences by disturbing obligate symbiosis function. For example, endosymbiotic dinoflagellates (family Symbiodiniaceae) can

meet up to 90% of coral energy requirements by providing glucose and other photosynthates (Burriesci et al., 2012; Davy et al., 2012; Falkowski et al., 1984; Muscatine et al., 1984). Yet this mutualism is highly temperature sensitive, as cnidarians lose their symbionts just 1–2°C above local summer mean temperatures in a process known as bleaching (Glynn, 1996; Hoegh-Guldberg et al., 2007). While bleaching is a visually striking stress response and thus an indispensable environmental monitoring tool (Hughes et al., 2017), recent studies have shown that heat stress can perturb coral carbon metabolism (Innis et al., 2021; Rådecker et al., 2021) and calcification (Allen-Waller and Barott, 2023; Inoue et al., 2012) even when bleaching does not occur. A better understanding of these more cryptic cnidarian heat stress responses is essential for predicting coral responses to climate change, and may assist in discovering additional coral resilience biomarkers (Barshis et al., 2010) that will help to identify stress-tolerant corals that can survive warming oceans (Putnam et al., 2017; Van Oppen and Gates, 2006).

The consequences of heat stress for the metabolism and cell physiology of marine invertebrates remain underexplored (Melzner et al., 2022), and more physiological data is necessary to predict how accelerating climate change will alter species abundance and distribution (Wagner et al., 2023). For example, thermal stress interferes with intracellular pH ( $\text{pH}_i$ ) regulation in many species. This includes corals (Allen-Waller and Barott, 2023; Gibbin et al., 2015; Innis et al., 2021), for which pH regulation is essential not only to survival but also calcification and thus reef persistence (Tresguerres et al., 2017). Understanding how heatwaves will affect cnidarian acid-base homeostasis is crucial as increasing atmospheric  $\text{CO}_2$  simultaneously acidifies and warms the oceans (Albright and Mason, 2013; Albright et al., 2016). However, the mechanism of thermal  $\text{pH}_i$  dysregulation in corals remains unclear. Disruption of symbiont  $\text{CO}_2$  uptake at high temperatures might lead to acidification in cells hosting endosymbionts (Gibbin et al., 2015); however, this does not explain why cells without symbionts are also more acidic after heat stress (Allen-Waller and Barott, 2023; Innis et al., 2021). ATP limitation resulting from symbiont loss might reduce available energy for acid-base homeostasis for the whole organism, as bleaching-susceptible individuals have lower  $\text{pH}_i$  than their bleaching-resistant neighbors during marine heatwaves (Innis et al., 2021). Yet even corals that do not bleach can suffer disrupted metabolism (Innis et al., 2021; Rådecker et al., 2021) and  $\text{pH}_i$  homeostasis (Innis et al., 2021) under heat stress. Symbiotic dysfunction is therefore unlikely to be the sole cause of thermal acid-base dysregulation. However, it remains unclear whether heat stress alters cnidarian  $\text{pH}_i$  by causing photophysiological stress in the resident Symbiodiniaceae, directly affecting host cellular processes, or by disrupting the mutualism itself.

To test the hypothesis that heat stress interferes with cnidarian acid-base regulation independent of symbiont loss, we conducted a comparative physiology analysis using symbiotic and aposymbiotic individuals from two cultures of a clonal line of the symbiotic sea anemone *Exaiptasia diaphana*, CC7. *E. diaphana* is a robust model for cnidarian symbiosis that can live indefinitely in culture without symbionts (Sunagawa et al., 2009; Weis et al., 2008). This species thus allows us to disentangle the direct effects of heat stress on the host from stress resulting from bleaching, avoiding complications associated with the severe stress experienced by corals following symbiont loss at elevated temperatures (Brown, 1997; Davy et al., 2012; Jones, 2008; Oakley and Davy, 2018). In order to investigate host-derived changes in acid-base homeostasis in relation to physiological disruptions resulting from bleaching, symbiotic and aposymbiotic CC7 *E. diaphana* (Sunagawa et al., 2009) were exposed to four increasing temperature treatments for two weeks: 25°C (ambient control), 27°C, 29°C, and 31°C. The experiment was repeated using two cohorts in order to test whether temperature responses were similar across populations acclimated to different laboratory culture conditions. We then measured symbiont density, protein content, intracellular pH ( $\text{pH}_i$ ), symbiont and host carbon assimilation, and metabolic rates (photosynthesis and respiration). We hypothesized that elevated temperatures would decrease host  $\text{pH}_i$  in all anemones, but that higher rates of photosynthesis and photosynthate translocation to the host in anemones hosting more and/or more productive symbionts could mitigate  $\text{pH}_i$  dysregulation in symbiotic individuals. These data provide crucial insights into how climate change alters cellular homeostasis in the context of endosymbiosis.

## MATERIALS AND METHODS

### Anemone populations

Symbiotic and aposymbiotic *Exaiptasia diaphana* of the CC7 male clonal strain were used in this study (Sunagawa et al., 2009). Aposymbiotic and symbiotic animals from two distinct CC7 populations (subsequently termed cohorts) were used. One cohort had been maintained in the Barott Lab at the University of Pennsylvania for several years with static temperature (25°C) and salinity (35 ppt; filtered Instant Ocean artificial seawater), twice weekly feedings with freshly hatched *Artemia*, and photosynthetically active radiation (PAR) of  $100 \mu\text{mol m}^{-2} \text{s}^{-1}$  on a 12h:12h light:dark schedule. The second cohort had been maintained in the Cleves Lab at the Carnegie Institution for Science for several years (25°C;  $25 \mu\text{mol m}^{-2} \text{s}^{-1}$  12h:12h; twice weekly *Artemia* feedings; 35 ppt salinity in filtered Instant Ocean artificial seawater). This second cohort was acclimated to all Barott Lab culture conditions for 3 weeks

prior to the experiment. Cohorts were analyzed separately because symbiotic animals from the two cohorts differed in important characteristics. Specifically, the Barott Lab cohort anemones had less pigmentation and larger body sizes, and thus were termed low-symbiont-density or 'LD'; the Cleves lab cohort anemones were darker with smaller body sizes, and were termed high-symbiont-density or 'HD' (Fig. 1). In both cohorts, aposymbiotic animals were generated from a subset of the corresponding symbiotic population and were maintained in an aposymbiotic state for several years prior to the start of the experiments. Aposymbiotic animals were kept in the dark in opaque tubs to prevent symbiont re-colonization and symbiotic anemones were kept in transparent tubs.

### Temperature treatment setup and monitoring

Anemones were randomly assigned to each of the four temperature treatments for both experiments. Target temperatures (25, 27, 29, and 31°C) were chosen to encompass a range of heat above anemone culture temperature (25°C) (Fig. 2). During the experiment, the anemones were kept in 118-mL containers (N=4 containers per treatment per symbiont status for each cohort, with 3-4 anemones per container; Fig. 2a) (Ziploc Twist n Loc, SC Johnson, Racine, WI) filled with 0.22  $\mu$ M-filtered artificial seawater (FSW) (salinity ~ 34 ppt; Instant Ocean Reef Crystals, Spectrum Brands, Blacksburg, VA). Aposymbiotic and symbiotic anemones were placed in separate containers, and the exterior of all aposymbiotic containers and lids were covered with black electrical tape to maintain dark culture conditions. Containers with symbiotic anemones were covered with transparent plastic film secured with rubber bands to minimize evaporation while permitting light to pass through. All containers were arranged randomly on racks in water baths (40 gal; one per temperature in each cohort) each equipped with a circulating pump (1500L/H Submersible Water Pump, Vivosun, Ontario, CA) and 1–2 50W heaters (either Aqueon Submersible Water Heater, Central Garden & Pet Company, Franklin, WI or Hygger Fish Tank Water Heater, Shenzhen Mago Trading Co., Shenzhen, China). Anemones were kept on a 12:12-hr light:dark cycle (NICREW HyperReef LED, Shenzhen NiCai Technology Co., Shenzhen, China), with photosynthetically active radiation ranging from 160–175  $\mu$ mol m<sup>-2</sup> sec<sup>-1</sup> for the duration of the experiment (Table 1). Water baths were arranged in a randomly assigned order for each separate experiment. Anemones were fed *Artemia* weekly through the experiments until 1 week prior to sampling and anemone containers were cleaned every ~3 days.

Containers were placed inside of the tanks 2 d prior to each experiment to acclimate anemones to their new surroundings. All tanks started at 25°C on Day 0 and were heated 1°C/d

until they reached their target temperatures (4-8 days; Fig. 2b-c). Seawater temperatures were recorded every 15 - 120 s using cross-calibrated temperature loggers (accuracy:  $\pm 0.11$  to  $0.29^{\circ}\text{C}$ ; HOBO UA-001-64, Onset Computer Corporation, Bourne, MA). Daily temperature measurements of the water bath were also recorded to ensure proper progression of the heat ramp (ProDSS with ODO/CT Probe, YSI, Yellow Springs, OH). In addition, temperatures inside each anemone container were measured on 6 separate days through the experiment. As containers were consistently cooler than the surrounding water bath, we calculated each treatment's mean temperature (Fig. 2b-c) based on the mean difference ( $T_{\text{tank}} - T_{\text{container}}$ ) subtracted from the water bath temperature. Anemones were monitored daily for mortality, and photographed every other day with a ruler and color standard at the bottom of each tub for size and color measurements. Anemone size and color were quantified in ImageJ (Abramoff et al., 2004). Size was measured by drawing a line across the widest point of each anemone's oral disk (excluding tentacles) and dividing the measured length by the measured length of a 1-cm line drawn on the ruler in the same image. Color was assessed using a modified coral color quantification protocol (Allen-Waller and Barott, 2023). Briefly, each image was converted to RGB, and the red channel was further examined. An ovoid region of interest was drawn to encompass each individual's oral disk, and intensity in that channel was divided by the intensity of the red standard in the same image to obtain percent intensity. Color scores are reported as  $[100\% - (\% \text{ red intensity})]$  because 100% red intensity corresponds to zero red pigment, a proxy for chlorophyll-a concentration (Bahr et al., 2020).

Anemones within the same treatment were sampled on the same day (one treatment per day over a four day period) for the following metrics: one anemone from each container was measured for *in vivo* metabolic rates (HD cohort only), then frozen at  $-80^{\circ}\text{C}$  for symbiont and protein content analysis; one was used for *in vivo* intracellular pH measurements; and one underwent a  $^{13}\text{C}$  stable isotope pulse-chase experiment. The order of sampling days differed between the HD and LD cohorts: the highest temperature was sampled on the first day in the LD cohort and on the last for the HD cohort.

### ***In vivo* photosynthesis and respiration**

Photosynthesis-irradiance curves were performed to determine photosynthetic and light-enhanced dark respiration (LEDR) rates for the HD cohort at the end of the 2-week experiment. Oxygen ( $\text{O}_2$ ) evolution was measured from 0 to  $270 \mu\text{mol m}^{-2} \text{s}^{-1}$  light on a subset of anemones ( $n = 8$  of each symbiotic status), totaling 32 anemones per treatment. Each anemone was individually enclosed in a 4 mL glass vial full of FSW and equipped with an optical  $\text{O}_2$ -sensor



(SV-PSt5, Presens, Regensburg, Germany). For each temperature treatment, four vials were filled with FSW and measured alongside anemones as blanks. Vials were then placed in a light-masked sensor dish reader (SDR SensorDish Reader with SDR-MSV24, Presens; factory pre-calibrated with Presens settings PSt5-2102-01\_25°C [Presens SDR Version 4.0.0, <https://www.presens.de/support-services/download-center/calibration-data>]) that optically measured O<sub>2</sub> concentration in 24 vials simultaneously while being mixed continuously at 200 rpm on a plate shaker (Talboys Standard Orbital Shaker, Troemner, West Deptford Township, NJ). Measurements were conducted inside of an incubator (B.O.D. Low Temperature Refrigerated Incubator, VWR, Radnor, PA) set to each group's experimental temperature, and constant temperatures during incubation were verified using a temperature logger (accuracy:  $\pm$  0.11 to 0.29°C; HOBO UA-001-64, Onset Computer Corporation) placed in a water bath inside the incubator. O<sub>2</sub> evolution was measured every 15 s for  $\geq$  10 min at each of six increasing light levels (24, 60, 113, 165, 217, and 270  $\mu\text{mol m}^{-2} \text{s}^{-1}$ ), then in total darkness for  $\geq$  10 min. Each anemone's O<sub>2</sub> evolution at each light level was quantified by plotting O<sub>2</sub> vs. time for the entire measurement period, manually subsetting the period where the slope was linear (5-10 min, starting  $\geq$  30 s after changing the light level to allow for light acclimation), and taking the slope of that linear period. Temperature- and light-specific blank values were determined by averaging O<sub>2</sub> evolution across the FSW-only vials at each light level, and this value was then subtracted from each anemone's measured O<sub>2</sub> evolution rate to account for microbial O<sub>2</sub> evolution. A total of 12 individuals (1 symbiotic and 11 apo) had O<sub>2</sub> evolution rates within  $\pm$  1 standard error of blank values in the dark, and were excluded from downstream analyses as they were deemed below the limit of detection, likely as a result of their small body size (55–140  $\mu\text{g}$  protein anemone<sup>-1</sup>). In total, N=15 symbiotic and N=5 aposymbiotic anemones were used for subsequent metabolic analyses. Total O<sub>2</sub> released or consumed over time was determined from the concentration by multiplying by the volume of seawater in the vial (4 mL). All O<sub>2</sub> evolution rates were then normalized to host protein content.

### **Symbiont density and host protein content**

Anemones were thawed and homogenized in 500  $\mu\text{L}$  deionized H<sub>2</sub>O at 25,000 rpm for 10 s using a tissue homogenizer (Fisherbrand 850 Homogenizer, Thermo Fisher Scientific, Waltham MA, USA) followed by needle-shearing until homogenous using a 22-gauge needle. Tissue homogenates were spun at 7,000 x g for 5 min to separate host (supernatant) and symbiont (pellet) fractions. Symbiodiniaceae were resuspended in 1% sodium dodecyl sulfate in 1X phosphate-buffered saline, and cell concentrations were determined in triplicate using a flow-

cytometer (Guava easyCyte 5HT, Luminex, Austin TX, USA) as described (Innis et al., 2021; Krediet et al., 2015). Protein concentration in the host fraction was measured on a spectrophotometer (BioTek PowerWave XS2, Agilent, Santa Clara CA, USA) using Coomassie Plus Bradford assay reagent (Pierce, Thermo Fisher Scientific).

### **Intracellular pH**

Cells were isolated from one randomly selected anemone from each anemone container ( $n = 4$  of each symbiotic state per treatment) by holding the anemone with forceps and brushing it against a small soft-bristled toothbrush submerged in 15 mL FSW for 2–4 min to break down tissue until enough isolated cells were obtained. The resulting cell suspension was passed through a 40  $\mu$ M cell strainer (Fisherbrand). Cells were then spun at 350 x g for 4 min and resuspended in 1 mL FSW with 10  $\mu$ M pH-sensitive cell dye SNARF-1 acetoxymethyl ester acetate (Invitrogen, Thermo Fisher Scientific) and 0.1% dimethylsulfoxide (Invitrogen) as described (Venn et al., 2009) for 20 min at 25°C in the dark. Live cells were then pelleted and resuspended in 1 mL FSW to remove any dye that did not enter the cells and imaged at 25°C in a glass-bottomed dish using an inverted confocal microscope (Leica SP8 DMI8, Leica Camera, Wetzlar, Germany) at 63x magnification (HC PL Apochromat C52 Oil objective, numerical aperture = 1.4). All samples were excited at 514 nm (10% power argon laser, 1% emission, 458/514/561 beam splitter) and SNARF-1 fluorescent emission was simultaneously acquired in two channels ( $585 \pm 15$  and  $640 \pm 15$  nm) using HyD detectors (gain = 100, pinhole = 1.00 airy unit). 512 x 512 pixel images were acquired at 8 bits/pixel using a scan speed of 400 Hz. Between 9–22 gastrodermal cells containing symbionts (symbiocytes) and 7–38 cells without symbionts (non-symbiocytes) were measured per symbiotic anemone; there were no symbiocytes present in aposymbiotic anemones so only non-symbiocytes are reported. SNARF-1 fluorescence ratios in anemone cytoplasm were quantified using ImageJ and normalized to background fluorescence as described (Innis et al., 2021), and converted to pH values using a calibration curve generated on the same microscope within 2 weeks of the experiment as described (Venn et al., 2009) (Supplemental Methods, Fig. S1).

### **Stable isotope tracer experiment**

One anemone per symbiotic anemone container ( $n = 4$  per treatment) was randomly selected to measure fixed carbon assimilation in the symbiont and translocation to the host using a stable isotope ( $\text{NaH}^{13}\text{CO}_3$ ) pulse-chase experiment. In addition, three wild-type aposymbiotic anemones were included during the 25°C incubation as controls, expected to



show no  $^{13}\text{C}$  assimilation due to a lack of symbionts. At 11:00 each sampling day, single anemones were placed in separate 50-mL conical tubes (Corning Falcon, Fisher Scientific) filled with FSW enriched with  $31.22\ \mu\text{M}\ \text{NaH}^{13}\text{CO}_3$  (Cambridge Isotope Laboratories, Andover, MA). Anemones were then replaced in their experimental temperature and light conditions inside their sealed tubes, upside down in a tube rack submerged in their water bath, for a 7-hr 'pulse' period so that symbionts could incorporate  $^{13}\text{C}$  via photosynthesis. After 7 h (18:00), the pulse was removed, anemones were rinsed with unamended FSW, and tubes were refilled with unamended FSW for the 12-hr 'chase' period. At 06:00 the following morning, the FSW was removed and anemones were frozen at  $-80^\circ\text{C}$  and maintained at  $-80^\circ\text{C}$  until processing. Samples were then thawed, homogenized, and separated into host and symbiont fractions as described above. Each fraction was then transferred directly into a pre-weighed opened tin capsule (EA Consumables, Marlton, NJ) and dried to stable weight for 24 h at  $50^\circ\text{C}$ . Capsules were then closed, weighed, and shipped to the University of California, Santa Cruz Stable Isotope Facility (Santa Cruz, CA) for  $^{13}\text{C}$  enrichment analysis by elemental analysis (NC2500 Elemental Analyzer, Carlo Erba Reagents GmbH, Emmendingen, Germany) coupled with isotope ratio mass spectrometry (Delta Plus XP iRMS, Thermo Scientific; coupling via: Conflo III, Thermo Scientific).

### Symbiont genotyping

Tissue slurries from 16 anemones from each cohort were used to verify Symbiodiniaceae identity at the species level. Symbionts were pelleted twice at  $10,000 \times g$  for 5 min, and DNA was extracted using the DNeasy Plant Mini Kit according to manufacturer instructions (Qiagen, Hilden, Germany). DNA quality was checked on a NanoDrop (Thermo Fisher Scientific) and 3 LD cohort samples were excluded from subsequent analysis due to poor quality. PCR primers were chosen to distinguish between SSA01/*Symbiodinium linuche* (homologous symbiont) and SSB01/*Breviolum minutum* (heterologous symbiont present in other strain cultures in the Barott lab). A fragment of the chloroplast 23S rDNA gene (cp23S) was amplified for two duplicate DNA samples from each anemone, one each using primers specific for SSA01 (F: 5'-CCTAATAACGACCTGCATGA-3'; R: 5'-TTTTGGTGATGATAAGCCGA-3') and SSB01 (F: 5'-GACGGCTGTAACCTATAACGG-3'; R: 5'-CCATCGTATTGAACCCAGC-3') (Zhang et al., 2000) (Thermo Fisher Scientific). All reactions were performed using  $0.2\ \mu\text{L}$  Platinum Taq Polymerase reaction<sup>-1</sup>, Platinum Taq 10X PCR Buffer,  $200\ \mu\text{M}$  dNTPs, and  $1.5\ \text{mM}$   $\text{MgCl}_2$  (Thermo Fisher Scientific) with the following conditions:  $94^\circ\text{C}$  for 5 min; then  $94^\circ\text{C}$  for 30 s,  $50^\circ\text{C}$  for 1 min,  $72^\circ\text{C}$  for 2 min for 35 cycles; finally  $72^\circ\text{C}$  for 10 min. PCR products were checked for

amplification using a 1% agarose gel alongside no-DNA extraction and PCR controls (Table S1). Amplified products were purified using Qiaquick PCR Purification Kit according to manufacturer instructions (Qiagen). A subset were Sanger sequenced (ABI 96-capillary 3730XL Sequencer, Applied Biosystems, Waltham MA) and compared with all available Symbiodiniaceae cp23S sequences to verify that primers had amplified intended targets (either the SSA01 and SSB01 cp23S sequence, respectively) using Needleman-Wunsch Global Alignment in NCBI BLAST (Altschul et al., 1997). Purified products were checked on a NanoDrop and those with the highest yield were then digested using the HphI restriction enzyme in CutSmart 10x Buffer (New England Biolabs, Ipswich, MA). Digests (39  $\mu$ L each) and an undigested control were run on a 2% agarose gel to verify digestion at a common cut site (Table S1).

### Statistical analysis

All data were analyzed in RStudio version 2022.07.2 (<https://www.rstudio.com/>) and plots were generated using the package *ggplot2* (Wickham, 2016). To find the best fit model for each response variable, relevant linear, linear mixed effects, and generalized additive models were developed using the *lme4* and *mgcv* packages (Bates et al., 2015; Wood, 2011). Corrected Akaike Information Criterion (AICc) were calculated for each model using the *MuMIn* package (Barton, 2023) and the model with the lowest AICc was chosen. Q-Q and residual plots were checked to ensure each model met normality and homogeneity of variance assumptions. All models are summarized in Table S2.

*Temperature treatments.* To compare temperatures of treatments within each cohort, one linear model analyzing daily average (24 hr mean) container temperature with treatment as a fixed effect (four levels: 25°C, 27°C, 29°C, and 31°C) was constructed for each cohort (HD and LD). To compare treatments between the two cohorts' experiments, a linear model analyzing daily mean container temperature with fixed effects of temperature (four levels: 25°C, 27°C, 29°C, and 31°C) and cohort (two levels: HD and LD) was constructed. Significant interactions were further explored with Tukey's HSD adjusted post-hoc pairwise comparison tests using the *emmeans* package (Lenth and Lenth, 2017). Experimental degree heating weeks (eDHW) were calculated for each treatment by summing the absolute value of the difference between the daily mean and 25°C, for all days over the course of the experiment where the daily mean exceeded 26°C (mean monthly maximum + 1°C (Leggat et al., 2022)). Mean monthly maximum was designated as 25°C since anemones were all maintained at 25°C before the experiment.

*Cohort physiological comparison.* The two experimental cohorts were compared for pigmentation (color) and size using data from both cohorts prior to temperature treatment. Cohort symbiont densities were assessed at the end of each experiment by comparing 25°C control anemones from each cohort. Temperature treatment was not found to have an effect on host protein, so protein densities from all temperatures were pooled within each cohort for between-cohort comparison. To verify that the pulsed  $^{13}\text{C}$  isotope was enriched in symbiotic anemones of both cohorts, carbon assimilation was compared between symbiotic host tissue, symbionts, and aposymbiotic control host tissue using a linear model with effects of cohort (two levels: HD vs. LD), symbiont status (two levels: symbiotic and aposymbiotic), and tissue fraction (two levels: host and symbiont).

*Physiological response to temperature.* Since cohorts differed in initial symbiont density and biomass, they were tested separately for the effect of temperature treatment (four levels: 25°C, 27°C, 29°C, and 31°C) and symbiotic status (two levels: symbiotic and aposymbiotic) on anemone physiology (host protein, symbiont density, symbiont carbon assimilation, host carbon assimilation, symbiocyte intracellular pH, and non-symbiocyte intracellular pH). For each variable, the best model was selected according to lowest AICc, after which any significant effects were further explored with Tukey's HSD adjusted post-hoc pairwise comparison tests using the *emmeans* package (Lenth and Lenth, 2017). Notably, refined models of non-symbiocyte intracellular pH that did not consider symbiotic status all had lower AICc than full models that accounted for symbiotic status, so aposymbiotic and symbiotic animals were combined for subsequent analysis of non-symbiocyte pH<sub>i</sub>.

*Respirometry.* To test effects of irradiance on O<sub>2</sub> evolution, generalized additive models (GAMs) with light level as a fixed effect were fit separately to each photosynthesis-irradiance curve for each HD cohort symbiotic and aposymbiotic anemone from each temperature using a modified respirometry analysis procedure (Becker and Silbiger, 2020). The maximum oxygen evolution rate from each anemone's predicted photosynthesis-irradiance GAM fit was calculated and defined as that anemone's maximum estimated net photosynthetic rate ( $P_{\text{max}}$ ). The optimal temperatures for both  $P_{\text{max}}$  and light-enhanced dark respiration (LED<sub>R</sub>) were then found by fitting two secondary GAM fits (one for  $P_{\text{max}}$  and one for LED<sub>R</sub>) for all anemones, with experimental temperature as a fixed effect, and calculating the inflection points using the first derivative of that GAM spline. Best-fit GAMs for  $P_{\text{max}}$  and LED<sub>R</sub> response to temperature were selected as described above.

*Principal components analysis.* For symbiotic animals only, differences in physiology were analyzed separately for each cohort using permutational multivariate analysis of variance

(PERMANOVA) using the *adonis* function of the *vegan* package (Oksanen et al., 2013) and principal components analysis (PCA) using the R *stats* package *prcomp* function with temperature as a fixed effect. To assess differences between anemones with different symbiont densities, the subset of physiological response variables that were measured in all anemones (protein content, symbiont density, and non-symbiocyte intracellular pH) was used to compare all individuals using a separate PERMANOVA and PCA with cohort (two levels: HD vs. LD) and symbiotic status (two levels: symbiotic vs. aposymbiotic) as fixed effects.

## RESULTS

### Anemone cohort traits

Symbiotic anemones from the two experimental cohorts differed significantly in symbiont density ( $F=3.96$ ,  $P=0.047$ ) and color ( $F=13.86$ ,  $P<0.001$ ) at control temperatures (Fig. 1). Specifically, symbiotic anemones from one cohort were darker in color than the other (Fig. 1a) and hosted more symbionts per anemone (mean =  $1.05 \times 10^6$  cells anemone<sup>-1</sup>; Fig. 1b); thus, they were termed high-symbiont-density or HD anemones. Symbiotic anemones from the other cohort were paler (Fig. 1a) and contained fewer symbionts (termed low-symbiont-density or LD; mean =  $2.69 \times 10^5$  cells anemone<sup>-1</sup>) (Fig. 1b). All anemones in which cp23S was successfully amplified contained a combination of SSA01 (*Symbiodinium linuche*) and SSB01 (*Breviolum minutum*) symbionts (Table S1).

Symbiotic LD anemones also contained more protein biomass per anemone than symbiotic HD anemones ( $F=75.94$ ,  $P<0.001$ ; Fig. 1d), corroborating observations of larger body size in the LD cohort ( $F=34.57$ ,  $P<0.001$ ; Fig. 1c). For both HD and LD cohorts, aposymbiotic anemones had significantly less protein biomass (HD:  $F=50.02$ ,  $P<0.001$ ; LD:  $F=57.71$ ,  $P<0.001$ ) and fewer symbionts (HD:  $F=229.2$ ,  $P<0.001$ ; LD:  $F=15.0$ ,  $P<0.001$ ) than their symbiotic counterparts (Fig. S2).

### Experimental conditions

Seawater temperatures in containers from all four treatments differed significantly from one another within both the HD ( $F=528.68$ ,  $P<0.001$ ; Tukey's HSD:  $P<0.001$  for all pairwise comparisons) and LD ( $F=2682.3$ ,  $P<0.001$ ; Tukey's HSD:  $P<0.001$  for all pairwise comparisons) cohort experiments. Between the two cohorts, the lowest three temperature treatments (25, 27, 29°C) did not differ (Tukey's HSD:  $P>0.15$ ), whereas the highest temperature was an average of 0.5°C warmer in the HD cohort than the LD cohort experiment (Tukey's HSD:  $P=0.017$ ),

reaching a maximum daily mean of 30.7°C and 30.2°C, respectively (Table 1; Fig. 2b-c). Total experimental degree heating weeks (eDHW) for the highest temperature treatments were 9.72°C wk<sup>-1</sup> for the HD and 6.53°C wk<sup>-1</sup> for the LD cohort (Table 1; Figure 2b-c). Intermediate temperatures experienced eDHW ranging from 0.37–5.82°C wk<sup>-1</sup>, and 25°C controls in both cohorts experienced 0°C wk<sup>-1</sup> (Table 1; Figure 2b-c).

### Temperature effects on symbiont density and photosynthate assimilation

Temperature differentially impacted symbiosis in the two anemone cohorts. As temperatures increased, HD anemones showed a significant decline in symbiont density ( $F=4.86$ ,  $P=0.005$ ; Fig. 3a; Fig. S2c) and a marginally insignificant trend of less symbiont photosynthate assimilation ( $F=3.00$ ,  $P=0.072$ ; Fig. 3c), which resulted in less host photosynthate assimilation at the highest temperature relative to 25°C controls ( $T=3.04$ ,  $P=0.044$ ; Fig. 3e). By contrast, elevated temperature did not cause significant reductions in symbiont density in LD anemones ( $F=0.06$ ,  $P=0.98$ ; Fig. 3b). Symbiont photosynthate assimilation in LD anemones was higher than in HD anemones ( $T=-4.39$ ,  $P<0.001$ ; Fig. S3a) and although LD symbiont photosynthate assimilation was significantly affected by temperature ( $F=9.49$ ,  $P=0.003$ ; Fig. 3d), higher temperatures did not consistently decrease LD host photosynthate assimilation ( $F=1.75$ ,  $p=0.22$ ; Fig. 3f). In fact, symbiont loss was only correlated with lower host photosynthate assimilation in HD anemones, and the correlation was weak ( $F=5.54$ ,  $P=0.034$ ,  $R^2=0.23$ ; Fig. S3b). In the LD cohort, anemones with fewer symbionts did not assimilate less photosynthate ( $F=0.12$ ,  $P=0.73$ ,  $R^2=-0.07$ ; Fig. S3c). Across both cohorts, aposymbiotic anemones assimilated significantly less <sup>13</sup>C than symbiotic hosts ( $F=-2.11$ ,  $P=0.040$ ), which in turn contained significantly less <sup>13</sup>C than their symbiont populations ( $F=-10.56$ ,  $P<0.001$ ), confirming that the <sup>13</sup>C pulse successfully enriched photosynthates in symbiont and host fractions (Fig. S3a).

There was no effect of temperature on protein content in symbiotic or aposymbiotic anemones from either the HD ( $F=0.433$ ,  $P=0.73$ ) or LD cohort ( $F=0.312$ ,  $P=0.816$ ) (Fig. S2a-b). Symbiont density model results were consistent whether symbiont density was calculated as cells per animal or cells per mg anemone protein (Fig. S3c-d), confirming that the observed changes in symbiont density per protein were not a result of changes in host biomass. Two symbiotic anemone containers (one container each from the 27°C and 29°C treatment; six anemones total) from the LD cohort experienced total mortality on day 14 and were not analyzed.

## Anemone metabolic performance

Photosynthesis:irradiance curves, measured only on the HD cohort of anemones, revealed significant metabolic changes across light levels in symbiotic anemones (edf: 1.98,  $F=70.77$ ,  $P<0.001$ ) and aposymbiotic anemones (edf: 1.94,  $F=11.83$ ,  $P<0.001$ ), with the highest photosynthesis and light-enhanced dark respiration (LED<sub>R</sub>) rates observed in the 27°C-incubated symbiotic group (Fig. S4a-b). Symbiotic anemones differed in their response to light from aposymbiotic anemones (Symbiotic Status \* Light:  $F=22.400$ ,  $p<0.0001$ ). Aposymbiotic anemones had lower O<sub>2</sub> evolution, though it was still  $\geq 0$  at some light levels, indicating some photosynthetic activity (presumably due to anemone surface-associated microbes) (Fig. S4a-b). Symbiotic and aposymbiotic groups were therefore treated separately for all subsequent respirometry analyses. Generalized additive models (GAM) fit to  $P_{\max}$  and LED<sub>R</sub> values for symbiotic individuals across the temperature treatments confirmed that temperature significantly affected both photosynthesis (edf: 2.79,  $F=4.22$ ,  $P=0.021$ ) and LED<sub>R</sub> (edf: 2.33,  $F=4.46$ ,  $P=0.030$ ) in symbiotic anemones (Fig. 4). The predicted optimal temperature for  $P_{\max}$  was  $26.39 \pm 1.39^\circ\text{C}$  (Fig. 4a), and the predicted temperature for maximum LED<sub>R</sub> was  $27.23 \pm 0.57^\circ\text{C}$  (Fig. 4b). In aposymbiotic anemones, temperature significantly influenced LED<sub>R</sub> ( $F=14.22$ ,  $P=0.001$ ) but not  $P_{\max}$  ( $F=3.19$ ,  $P=0.090$ ) (Fig. S4c-d).

## Effect of elevated temperatures on anemone intracellular pH

Temperature significantly affected intracellular pH (pH<sub>i</sub>) of cells from both aposymbiotic and symbiotic anemones (Fig. 5). Symbiont-hosting cells (symbiocytes) tended to become more acidic with increasing temperature for both cohorts (Fig 5a,c). This effect was significant in the LD cohort ( $F=4.25$ ,  $P=0.035$ , Fig. 5c) but only borderline significant in the HD cohort ( $F=3.00$ ,  $P=0.073$ , Fig. 5a). Cells without symbionts (non-symbiocytes) showed a significant but non-monotonic temperature response (HD:  $F=10.97$ ,  $P<0.001$ ; LD:  $F=10.22$ ,  $P<0.001$ ), with 31°C-treated anemones having the most acidic cells in both cohorts (Fig. 5b,d). Within each cohort, there was no effect of anemone symbiotic state on pH<sub>i</sub>: aposymbiotic and symbiotic anemones had the same non-symbiocyte pH<sub>i</sub> within each temperature, and showed the same thermal acid-base disruption (Fig 5b,d). Interestingly, non-symbiocyte pH<sub>i</sub> differed between cohorts, and was significantly higher in the HD cohort than the LD cohort across temperatures ( $F=22.08$ ,  $P<0.001$ ; Fig. 5f). Moreover, host photosynthate assimilation only correlated with pH<sub>i</sub> of symbiocytes from HD anemones ( $F=7.98$ ,  $P=0.013$ ,  $R^2=0.32$ ; Fig. 5e); there was no association between host photosynthate and pH<sub>i</sub> of HD non-symbiocytes ( $F=0.056$ ,  $P=0.82$ ,  $R^2=-0.07$ ; Fig. 5f) or of either



cell category in LD anemones (non-symbiocytes:  $F=0.76$ ,  $P=0.40$ ,  $R^2=-0.02$ ; symbiocytes:  $F=1.62$ ,  $P=0.22$ ,  $R^2=0.05$ ; Fig. 5e-f).

### Physiological separation by temperature and symbiotic status

Principal components analysis revealed symbiotic anemone physiology differed by temperature in both cohorts (HD:  $F=4.17$ ,  $P=0.001$ ; LD:  $F=2.12$ ,  $P=0.026$ ; Fig. S5). This consistent effect was largely driven by differences in intracellular pH and photosynthate assimilation (Fig. S5). However, separation of temperature groups differed between cohorts, largely because HD anemones in the hottest treatment assimilated less photosynthate than 25°C controls (Fig. S5a, Fig. 3c-d), while LD anemones under the same conditions assimilated more photosynthate than controls (Fig. S5b; Fig. 3e-f). Anemones also clustered separately by both cohort and symbiotic status. Consistent with their difference in overall temperature response, anemones from the two cohorts and symbiotic statuses all separated by host protein content and non-symbiocyte  $pH_i$ , as well as by symbiont density (Fig. 6).

## DISCUSSION

### Elevated temperature causes intracellular acidosis regardless of organismal symbiotic status

Elevated temperatures consistently affected intracellular pH ( $pH_i$ ) in aposymbiotic and symbiotic *Exaiptasia diaphana*, tending to decrease nonsymbiocyte  $pH_i$  relative to animals at ambient temperatures. Furthermore, symbiotic anemone cohorts exhibited similar patterns of cellular acidification in response to increasing temperature despite differences in initial physiologies and bleaching responses. The consistency of these responses across different anemone populations indicates that neither endosymbiont presence nor their loss (i.e., bleaching) is necessary for acid-base dysregulation as temperatures increase above anemones' thermal optimum. Further, the acidified  $pH_i$  we observed in the highest temperature treatments among all anemones (aposymbiotic, high-symbiont-density, and low-symbiont density) indicates that heat stress accumulated at this temperature in ways that assessments of symbiont density did not reveal. While previous research in corals has suggested that heat stress alters pH regulation by interfering with symbiont photosynthesis and/or photosynthate translocation to the host (Allen-Waller and Barott, 2023; Cameron et al., 2022; Gibbin et al., 2015; Innis et al., 2021), the anemone responses recorded here indicate that heat can also impair cnidarian acid-base regulation independently of bleaching and the functional breakdown of the cnidarian-

dinoflagellate symbiosis. These conclusions are not mutually exclusive, as heat stress likely disrupts both symbiont influence on and host control over host acid-base homeostasis. Multiple simultaneous host- and symbiont-derived pH regulatory mechanisms could help explain why heatwaves can impair coral acid-base homeostasis even in corals that do not lose their symbionts (Allen-Waller and Barott, 2023; Innis et al., 2021). Interestingly, bleaching resistance reduces the effect of heat on  $pH_i$  in corals (Innis et al., 2021), supporting contributions from both symbiont and host to acid-base dysregulation at high temperatures.

Many aquatic animals experience intracellular acidosis at high temperatures (e.g., (Malan et al., 1976; Pörtner et al., 1999; Reeves and Malan, 1976)). Some of this is likely driven by a passive physicochemical effect of temperature on intracellular buffer molecules, whereby bicarbonate, phosphate, and proteins'  $pK$  values change with temperature (Van Dijk et al., 1997). Heat may also lead to cellular acidification by decreasing lysosomal membrane stability, causing  $H^+$  to leak from acidic lysosomes (Dimitriadis et al., 2012; Strand et al., 2017). These mechanisms may have contributed to lowered cellular  $pH_i$  observed across *E. diaphana* cell categories and symbiont densities at 31°C in the present study, and warrant further characterization in cnidarians. In addition, high temperatures increase metabolic demands in marine invertebrates (e.g., (Brockington et al., 2001)), including symbiotic cnidarians (Rädecker et al., 2021), and we hypothesize that this directly limits cellular capacity to regulate acid-base homeostasis. In support of this hypothesis, we observed significantly lower respiration and photosynthetic rates in symbiotic anemones held at our highest treatment temperature (31°C), suggesting metabolic impairment from accumulated heat stress that could substantially reduce available energy. Thermal energy limitations can reduce  $pH_i$  in marine invertebrates by reducing available ATP (Pörtner et al., 1999); in cnidarians, lower ATP levels would constrain the capacity of membrane-bound ATPases and related transporters (e.g. vacuolar  $H^+$ -ATPase,  $Na^+$ - $K^+$ -ATPase,  $Na^+$ - $H^+$  exchangers) that are essential for active pH regulation in different cellular compartments (Barott et al., 2015a; Barott et al., 2015b; Barott et al., 2022; Tresguerres et al., 2017). Alternatively, cnidarians might respond to energy limitations by reducing expression of acid-base regulatory proteins (e.g., ion channels and transporters), as has been shown in reef-building corals (Bernardet et al., 2019; Kenkel et al., 2013). Further research is necessary to determine the relative contributions of these different possible mechanisms regulating cnidarian acid-base homeostasis.

### **Bleaching response varied with initial symbiont density and body size**

Anemone bleaching response varied with initial symbiont density, as anemones with high initial symbiont densities lost symbionts in the two highest temperature treatments, while anemones initially hosting lower symbiont densities did not. This result is consistent with greater bleaching sensitivity in cnidarians with denser symbiont loads (Cunning and Baker, 2013) and demonstrates the importance of considering variability of responses between different populations of the same clonal line. While the HD cohort had to acclimate to higher light levels than in its previous culture conditions leading up to the experiment, this was controlled across temperature treatments, and the ~50% reduction in symbiont density at 31°C relative to 25°C controls confirms this was a response to temperature and not to increased light intensity.

The two anemone cohorts also differed in their initial body size and protein biomass, which also may have influenced their bleaching responses. Fewer symbionts in larger-bodied LD anemones led to a higher host biomass:symbiont ratio, which could have prevented overloading of reactive oxygen species from symbiont dysfunction as temperatures increased (Cunning and Baker, 2013; Nesa and Hidaka, 2009; Wooldridge, 2009). Higher-biomass LD anemones may have also relied more on heterotrophy than the HD cohort (Hoogenboom et al., 2015), although both cohorts had equal access to food. In reef-building corals, higher heterotrophic feeding can compensate for symbiont loss (e.g. (Grottoli et al., 2006)) and can increase symbiont photosynthate assimilation (Krueger et al., 2018) and translocation from symbionts during heat stress (Tremblay et al., 2016). It is also possible that higher-biomass anemones had more energy reserves to catabolize in the absence of autotrophic resources during heat stress. Future studies should test the separate and combined influences of heterotrophy and symbiont density on *E. diaphana* bleaching susceptibility to better explain these observations.

Despite cohort differences in symbiont density and body size, symbiotic anemones from the lowest and highest temperatures separated in principal components analysis consistently within each cohort, driven largely by changes in carbon assimilation and pH<sub>i</sub>. Differences in carbon assimilation across temperatures were expected, given that heat stress typically decreases Symbiodiniaceae carbon assimilation (Ros et al., 2020) and translocation to cnidarian hosts (Allen-Waller and Barott, 2023; Baker et al., 2018; Tremblay et al., 2016). Yet our highest temperature treatment (31°C) only depressed host photosynthate assimilation in HD anemones with denser initial symbiont populations, even though the HD cohort assimilated less photosynthate overall relative to LD anemones at 31°C. The mechanisms driving this pattern are unknown, but it is possible that high temperatures increase high-density symbionts'

competition over light, CO<sub>2</sub>, and/or nutrients (Cunning et al., 2015a; Cunning et al., 2017; Hoogenboom et al., 2010; Wooldridge, 2009). Given HD anemones' higher photosynthate assimilation than LD anemones under control conditions (25°C), along with their greater thermal sensitivity of carbon assimilation, it is also possible that HD anemones may have relied more on autotrophic energy than the LD cohort at permissive temperatures, rendering them more likely to bleach when temperatures increased. These cohort-dependent physiological differences within a clonal line of *E. diaphana* highlight the importance of repeating studies in different populations and accounting for cohort variation in this cnidarian model.

### **Endosymbiosis modulates cellular response to heat stress**

Symbiont presence within anemone cells modulated how host acid-base homeostasis was affected by heat stress: symbiocytes were most acidic at 31°C, whereas non-symbiocytes showed a dip in pH<sub>i</sub> at 27°C relative to 25°C, and then decreased again at 31°C. The decline in pH<sub>i</sub> of non-symbiocytes at 27°C corresponded with anemones' peak metabolic rates, suggesting that metabolism may be important to these cells' non-linear response to temperature. Specifically, excess CO<sub>2</sub> from high respiration rates at this temperature could acidify non-symbiocytes, but in symbiocytes, rapidly photosynthesizing symbionts at the same temperature may have mitigated this respiratory acidosis by drawing down dissolved inorganic carbon from the cytosol (Gibbin and Davy, 2014; Gibbin et al., 2014; Laurent et al., 2013; Putnam et al., 2017). While all anemones in this experiment were dark-acclimated for at least 40 min prior to imaging to reduce the effects of photosynthesis, it is possible that anemones with more photosynthetically active symbionts had accumulated less CO<sub>2</sub> prior to dark acclimation, leading to a higher cell pH<sub>i</sub> that persisted even after dark-acclimation.

Symbiocytes may also have differed from non-symbiocytes in their acidosis response due to differences in cytosolic buffering capacities between cell lineages, as is common in other species (Madshus, 1988). Since non-symbiocytes are defined simply as cells not containing Symbiodiniaceae, they could be of any host cell lineage, while symbiocytes are a single cell type originating from the gastrodermis (Glider et al., 1980). Non-symbiocytes and symbiocytes therefore likely have pH<sub>i</sub> regulatory differences simply because cnidarian cell types differ greatly in cell contents and membrane-bound transporters (Levy et al., 2021). For example, dissolved inorganic carbon transport is a major factor affecting pH<sub>i</sub> that is known to vary by cell type, as multiple coral species express Na<sup>+</sup>/K<sup>+</sup>-ATPase, sodium bicarbonate cotransporters, and carbonic anhydrases with a high degree of tissue specificity (Barott et al., 2015b; Bertucci et al., 2011). Because acid-base homeostasis comprises diverse active and passive processes

(Boron, 2004), we hypothesize cnidarian  $pH_i$  is governed by multiple different temperature-dependent mechanisms, a subset of which differ between cells with and without symbionts. Future studies should investigate cellular and molecular determinants of thermal  $pH_i$  dysregulation to determine which of these are specific to cells harboring intracellular symbionts.

Both cell category and initial organismal symbiont density affected the relationship between nutritional symbiosis function and pH regulation. Non-symbiocytes from the high-symbiont-density (HD) cohort consistently had higher  $pH_i$  than low-symbiont-density (LD) cohort non-symbiocytes. Interestingly, this pattern was independent of host photosynthate assimilation, and is therefore unlikely to result from our hypothesized trophic differences between cohorts. Instead, this persistent difference in  $pH_i$  setpoint once again suggests there are cohort-level differences in *E. diaphana* cellular physiology that warrant further exploration. In symbiocytes, while there was no overall relationship between host organic carbon assimilation and  $pH_i$ ,  $pH_i$  specifically increased with host photosynthate assimilation only in HD anemones. This could result from temperature sensitivity in symbiont inorganic carbon uptake; that is, if the low photosynthetic rates we observed under heat stress limited symbiont  $CO_2$  drawdown from the cytosol, high temperatures could simultaneously lower  $pH_i$  in symbiocytes relative to those at ambient temperatures while also decreasing symbionts' ability to translocate photosynthate to the host. In this scenario, non-symbiocyte  $pH_i$  would have decreased at high temperatures for separate reasons unrelated to symbiosis. This is consistent with our reasoning that the host and symbiont play separate roles in regulating  $pH_i$ .

Alternatively, heat stress could have decreased symbiont productivity by disrupting host acid-base regulation of the symbiosome. If  $pH_i$  dysregulation in symbiotic cnidarians does not depend on bleaching, then the inability to regulate pH at high temperatures could itself contribute to symbiosis breakdown. Loss of cnidarian host control over symbiosome contents has been linked to symbiotic breakdown (Cui et al., 2019; Rådecker et al., 2018; Rådecker et al., 2021; Xiang et al., 2020), and corals use a vacuolar  $H^+$ -ATPase to concentrate inorganic carbon in the symbiosome to promote carbon fixation by the symbiont (Barott et al., 2015a). Cnidarian host  $pH_i$  dysregulation, whether by ATP limitation or changes to passive buffering, could therefore 1) lead to accumulation of protons in the cytosol, decreasing symbiocyte  $pH_i$ ; and 2) contribute to the holobiont carbon limitation that is theorized to precipitate bleaching (Cunning et al., 2017; Rådecker et al., 2021; Wooldridge, 2009). This is consistent with our result that photosynthate assimilation decreased with low symbiocyte  $pH_i$  in the HD cohort, in which heat stress disrupted symbiotic function, but not in the putatively more heterotrophic LD cohort, which did not experience bleaching. Further research should test whether thermal acid-

base dysregulation can initiate or exacerbate symbiont loss. Such a positive feedback mechanism between host and symbiont stress responses could lead to damaging synergistic effects as environmental change accelerates (Bénard et al., 2020).

## Conclusion

Here we demonstrate that thermally induced acid-base dysregulation can occur independently of bleaching in cnidarians. Heat stress appears to impose metabolic constraints on *E. diaphana* that are separate from symbiont loss, which we hypothesize disrupt their ability to maintain acid-base homeostasis. This may have negative consequences for survival of cnidarians as well as other non-endosymbiotic marine invertebrates, as the ability to reallocate ATP to pH regulatory processes is thought to be a crucial mechanism of climate change resilience (Pan et al., 2015; Sokolova et al., 2012). While endosymbiosis-specific effects on  $\text{pH}_i$  confirm that Symbiodiniaceae metabolism also contributes to host acid-base homeostasis, the direct effect of heat on host  $\text{pH}_i$  raises the intriguing possibility that thermal pH dysregulation precedes or even contributes to symbiont loss; however, additional study is necessary to validate this hypothesis. Regardless, as sea surface temperatures continue to rise (Johnson and Lyman, 2020) and marine heatwaves become more frequent and severe (Smith et al., 2023), it is crucial that we better understand how thermal stress impacts marine invertebrate cellular homeostasis. Future research on cnidarian thermotolerance should investigate specific mechanisms of ion transport disruption under heat stress. Ion transport is vital for fundamental processes including protein stability, endosymbiosis, and calcification; its disruption, while less immediately visible than bleaching, is thus an existential threat to cnidarians (Tresguerres et al., 2014; Tresguerres et al., 2017). Understanding thermal sensitivity of ion transport and acid-base homeostasis is particularly vital as increasing atmospheric  $\text{CO}_2$  simultaneously acidifies and warms the oceans (Albright and Mason, 2013; Albright et al., 2016; Harvey et al., 2013). Finally, our study also demonstrates how physiological experiments in model symbiotic organisms like *E. diaphana* help address the broader question of how endosymbionts can mitigate and/or exacerbate host responses to rapid climate change, while highlighting that these effects are not uniform across populations.

## ACKNOWLEDGEMENTS

The authors would like to thank Philip A. Cleves and Natalie Swinhoe for animal cultures and husbandry advice, Benjamin Glass and Amara Okongwu for useful discussions and



respirometry assistance, and Colin Carney and the staff of the UC-Santa Cruz Stable Isotope Facility for isotope analysis assistance.

## COMPETING INTERESTS

The authors declare no competing or financial interests.

## AUTHOR CONTRIBUTIONS

Conceptualization: L.A., K.L.B.; Methodology: L.A., M.P.M., K.L.B., K.G.J., K.T.B.; Software: L.A., K.G.J.; Validation: L.A., M.P.M., K.G.J., K.T.B., K.L.B.; Formal analysis: L.A., K.G.J., M.P.M., K.T.B.; Investigation: L.A., K.G.J., M.P.M.; Resources: K.L.B.; Data curation: L.A., K.G.J., M.P.M., K.T.B.; Writing - original draft: L.A.; Writing - review & editing: K.L.B., K.T.B., K.G.J., M.P.M., L.A.; Visualization: L.A., K.G.J.; Supervision: K.L.B.; Project administration: K.L.B., L.A.; Funding acquisition: K.L.B.

## FUNDING

This research was supported by NSF-OCE #577582 to K.L.B., Charles E. Kaufman Foundation New Investigator Award #581073 to K.L.B., a 2022 Career Services Summer Funding Grant from the University of Pennsylvania Center for Undergraduate Research and Fellowships to K.G.J., and the University of Pennsylvania.

## DATA AVAILABILITY

All raw data and R scripts used in data analysis are available on Github (<https://github.com/allenwaller/Aiptasia.Heat.pHi>).

## REFERENCES

- Abramoff, Magalhães, P. J. and Ram, S. J.** (2004). Image processing with ImageJ. *Biophotonics Int.* **11**, 36–42.
- Albright, R. and Mason, B.** (2013). Projected near-future levels of temperature and pCO<sub>2</sub> reduce coral fertilization success. *PLoS One* **8**, e56468.

- Albright, R., Caldeira, L., Hosfelt, J., Kwiatkowski, L., Maclaren, J. K., Mason, B. M., Nebuchina, Y., Ninokawa, A., Pongratz, J., Ricke, K. L., et al.** (2016). Reversal of ocean acidification enhances net coral reef calcification. *Nature* **531**, 362–365.
- Allen-Waller, L. and Barott, K. L.** (2023). Symbiotic dinoflagellates divert energy away from mutualism during coral bleaching recovery. *Symbiosis* **89**, 173–186.
- Altschul, S. F., Madden, T. L., Schäffer, A. A., Zhang, J., Zhang, Z., Miller, W. and Lipman, D. J.** (1997). Gapped BLAST and PSI-BLAST: a new generation of protein database search programs. *Nucleic Acids Res.* **25**, 3389–3402.
- Apprill, A.** (2020). The Role of Symbioses in the Adaptation and Stress Responses of Marine Organisms. *Ann. Rev. Mar. Sci.* **12**, 291–314.
- Atkins, K. E. and Travis, J. M. J.** (2010). Local adaptation and the evolution of species' ranges under climate change. *J. Theor. Biol.* **266**, 449–457.
- Bahr, K. D., Severino, S. J. L., Tsang, A. O., Han, J. J., Richards Dona, A., Stender, Y. O., Weible, R. M., Graham, A., McGowan, A. E. and Rodgers, K. S.** (2020). The Hawaiian Ko'a Card: coral health and bleaching assessment color reference card for Hawaiian corals. *SN Applied Sciences* **2**, 1706.
- Baker, D. M., Freeman, C. J., Wong, J. C. Y., Fogel, M. L. and Knowlton, N.** (2018). Climate change promotes parasitism in a coral symbiosis. *ISME J.* **12**, 921–930.
- Barott, K. L., Venn, A. A., Perez, S. O., Tambutté, S. and Tresguerres, M.** (2015a). Coral host cells acidify symbiotic algal microenvironment to promote photosynthesis. *Proc. Natl. Acad. Sci. U. S. A.* **112**, 607–612.
- Barott, K. L., Perez, S. O., Linsmayer, L. B. and Tresguerres, M.** (2015b). Differential localization of ion transporters suggests distinct cellular mechanisms for calcification and photosynthesis between two coral species. *Am. J. Physiol. Regul. Integr. Comp. Physiol.* **309**, R235–46.
- Barott, K. L., Thies, A. B. and Tresguerres, M.** (2022). V-type H<sup>+</sup>-ATPase in the symbiosome membrane is a conserved mechanism for host control of photosynthesis in anthozoan photosymbioses. *Royal Society Open Science* **9**, 211449.

- Barshis, D. J., Stillman, J. H., Gates, R. D., Toonen, R. J., Smith, L. W. and Birkeland, C.** (2010). Protein expression and genetic structure of the coral *Porites lobata* in an environmentally extreme Samoan back reef: does host genotype limit phenotypic plasticity? *Mol. Ecol.* **19**, 1705–1720.
- Barton, K.** (2023). Multi-model inference. R package version 1.47.5 2023.
- Bates, D., Mächler, M., Bolker, B. and Walker, S.** (2015). Fitting Linear Mixed-Effects Models using lme4. *J. Stat. Softw.* **67**, 1–48.
- Becker, D. M. and Silbiger, N. J.** (2020). Nutrient and sediment loading affect multiple facets of functionality in a tropical branching coral. *J. Exp. Biol.* **223**,.
- Bénard, A., Vavre, F. and Kremer, N.** (2020). Stress & Symbiosis: Heads or Tails? *Frontiers in Ecology and Evolution* **8**,.
- Bernardet, C., Tambutté, E., Techer, N., Tambutté, S. and Venn, A. A.** (2019). Ion transporter gene expression is linked to the thermal sensitivity of calcification in the reef coral *Stylophora pistillata*. *Sci. Rep.* **9**, 18676.
- Bertucci, A., Tambutté, S., Supuran, C. T., Allemand, D. and Zoccola, D.** (2011). A new coral carbonic anhydrase in *Stylophora pistillata*. *Mar. Biotechnol.* **13**, 992–1002.
- Boron, W. F.** (2004). Regulation of intracellular pH. *Adv. Physiol. Educ.* **28**, 160–179.
- Brockington, S., Clarke, A. and Chapman, A.** (2001). Seasonality of feeding and nutritional status during the austral winter in the Antarctic sea urchin *Sterechinus neumayeri*. *Mar. Biol.* **139**, 127–138.
- Brown, B. E.** (1997). Coral bleaching: causes and consequences. *Coral Reefs* **16**, S129–S138.
- Burriesci, M. S., Raab, T. K. and Pringle, J. R.** (2012). Evidence that glucose is the major transferred metabolite in dinoflagellate--cnidarian symbiosis. *J. Exp. Biol.* **215**, 3467–3477.
- Cameron, L. P., Reymond, C. E., Bijma, J., Büscher, J. V., De Beer, D., Guillermic, M., Eagle, R. A., Gunnell, J., Müller-Lundin, F., Schmidt-Grieb, G. M., et al.** (2022). Impacts of Warming and Acidification on Coral Calcification Linked to Photosymbiont Loss and Deregulation of Calcifying Fluid pH. *J. Mar. Sci. Eng.* **10**, 1106.

- Cui, G., Liew, Y. J., Li, Y., Kharbatia, N., Zahran, N. I., Emwas, A.-H., Eguiluz, V. M. and Aranda, M.** (2019). Host-dependent nitrogen recycling as a mechanism of symbiont control in *Aiptasia*. *PLoS Genet.* **15**, e1008189.
- Cunning, R. and Baker, A. C.** (2013). Excess algal symbionts increase the susceptibility of reef corals to bleaching. *Nature Climate Change* **3**, 259–262.
- Cunning, R., Vaughan, N., Gillette, P., Capo, T. R., Matté, J. L. and Baker, A. C.** (2015a). Dynamic regulation of partner abundance mediates response of reef coral symbioses to environmental change. *Ecology* **96**, 1411–1420.
- Cunning, R., Silverstein, R. N. and Baker, A. C.** (2015b). Investigating the causes and consequences of symbiont shuffling in a multi-partner reef coral symbiosis under environmental change. *Proc. Biol. Sci.* **282**, 20141725.
- Cunning, R., Muller, E. B., Gates, R. D. and Nisbet, R. M.** (2017). A dynamic bioenergetic model for coral-Symbiodinium symbioses and coral bleaching as an alternate stable state. *J. Theor. Biol.* **431**, 49–62.
- Davy, S. K., Allemand, D. and Weis, V. M.** (2012). Cell Biology of Cnidarian-Dinoflagellate Symbiosis. *Microbiology and Molecular Biology Reviews* **76**, 229–261.
- Dimitriadis, V. K., Gougoula, C., Anestis, A., Pörtner, H. O. and Michaelidis, B.** (2012). Monitoring the biochemical and cellular responses of marine bivalves during thermal stress by using biomarkers. *Mar. Environ. Res.* **73**, 70–77.
- Falkowski, P. G., Dubinsky, Z., Muscatine, L. and Porter, J. W.** (1984). Light and the Bioenergetics of a Symbiotic Coral. *Bioscience* **34**, 705–709.
- Gibbin, E. M. and Davy, S. K.** (2014). The photo-physiological response of a model cnidarian–dinoflagellate symbiosis to CO<sub>2</sub>-induced acidification at the cellular level. *J. Exp. Mar. Bio. Ecol.* **457**, 1–7.
- Gibbin, E. M., Putnam, H. M., Davy, S. K. and Gates, R. D.** (2014). Intracellular pH and its response to CO<sub>2</sub>-driven seawater acidification in symbiotic versus non-symbiotic coral cells. *J. Exp. Biol.* **217**, 1963–1969.

- Gibbin, E. M., Putnam, H. M., Gates, R. D., Nitschke, M. R. and Davy, S. K.** (2015). Species-specific differences in thermal tolerance may define susceptibility to intracellular acidosis in reef corals. *Mar. Biol.* **162**, 717–723.
- Glider, W. V., Phipps, D. W. and Pardy, R. L.** (1980). Localization of Symbiotic Dinoflagellate Cells within Tentacle Tissue of *Aiptasia pallida* (Coelenterata, Anthozoa). *Trans. Am. Microsc. Soc.* **99**, 426–438.
- Glynn, P. W.** (1996). Coral reef bleaching: facts, hypotheses and implications. *Glob. Chang. Biol.* **2**, 495–509.
- Goulet, T. L. and Goulet, D.** (2021). Climate Change Leads to a Reduction in Symbiotic Derived Cnidarian Biodiversity on Coral Reefs. *Frontiers in Ecology and Evolution* **9**, 636279.
- Grottoli, A. G., Rodrigues, L. J. and Palardy, J. E.** (2006). Heterotrophic plasticity and resilience in bleached corals. *Nature* **440**, 1186–1189.
- Harvey, B. P., Gwynn-Jones, D. and Moore, P. J.** (2013). Meta-analysis reveals complex marine biological responses to the interactive effects of ocean acidification and warming. *Ecol. Evol.* **3**, 1016–1030.
- Hoegh-Guldberg, O., Mumby, P. J., Hooten, A. J., Steneck, R. S., Greenfield, P., Gomez, E., Harvell, C. D., Sale, P. F., Edwards, A. J., Caldeira, K., et al.** (2007). Coral reefs under rapid climate change and ocean acidification. *Science* **318**, 1737–1742.
- Hoogenboom, M., Beraud, E. and Ferrier-Pagès, C.** (2010). Relationship between symbiont density and photosynthetic carbon acquisition in the temperate coral *Cladocora caespitosa*. *Coral Reefs* **29**, 21–29.
- Hoogenboom, M., Rottier, C., Sikorski, S. and Ferrier-Pagès, C.** (2015). Among-species variation in the energy budgets of reef-building corals: scaling from coral polyps to communities. *J. Exp. Biol.* **218**, 3866–3877.
- Hughes, T. P., Kerry, J. T., Álvarez-Noriega, M., Álvarez-Romero, J. G., Anderson, K. D., Baird, A. H., Babcock, R. C., Beger, M., Bellwood, D. R., Berkelmans, R., et al.** (2017). Global warming and recurrent mass bleaching of corals. *Nature* **543**, 373–377.

- Hughes, T. P., Anderson, K. D., Connolly, S. R., Heron, S. F., Kerry, J. T., Lough, J. M., Baird, A. H., Baum, J. K., Berumen, M. L., Bridge, T. C., et al.** (2018). Spatial and temporal patterns of mass bleaching of corals in the Anthropocene. *Science* **359**, 80–83.
- Innis, T., Allen-Waller, L., Brown, K. T., Sparagon, W., Carlson, C., Kruse, E., Huffmyer, A. S., Nelson, C. E., Putnam, H. M. and Barott, K. L.** (2021). Marine heatwaves depress metabolic activity and impair cellular acid-base homeostasis in reef-building corals regardless of bleaching susceptibility. *Glob. Chang. Biol.* **27**, 2728–2743.
- Inoue, M., Shinmen, K., Kawahata, H., Nakamura, T., Tanaka, Y., Kato, A., Shinzato, C., Iguchi, A., Kan, H., Suzuki, A., et al.** (2012). Estimate of calcification responses to thermal and freshening stresses based on culture experiments with symbiotic and aposymbiotic primary polyps of a coral, *Acropora digitifera*. *Glob. Planet. Change* **92–93**, 1–7.
- Johnson, G. C. and Lyman, J. M.** (2020). Warming trends increasingly dominate global ocean. *Nat. Clim. Chang.* **10**, 757–761.
- Jones, R. J.** (2008). Coral bleaching, bleaching-induced mortality, and the adaptive significance of the bleaching response. *Mar. Biol.* **154**, 65–80.
- Kenkel, C. D., Meyer, E. and Matz, M. V.** (2013). Gene expression under chronic heat stress in populations of the mustard hill coral (*Porites astreoides*) from different thermal environments. *Mol. Ecol.* **22**, 4322–4334.
- Kim, S. W., Sommer, B., Beger, M. and Pandolfi, J. M.** (2023). Regional and global climate risks for reef corals: Incorporating species-specific vulnerability and exposure to climate hazards. *Glob. Chang. Biol.* **29**, 4140–4151.
- Krediet, C. J., DeNofrio, J. C., Caruso, C., Burriesci, M. S., Cella, K. and Pringle, J. R.** (2015). Rapid, Precise, and Accurate Counts of Symbiodinium Cells Using the Guava Flow Cytometer, and a Comparison to Other Methods. *PLoS One* **10**, e0135725.
- Krueger, T., Bodin, J., Horwitz, N., Loussert-Fonta, C., Sakr, A., Escrig, S., Fine, M. and Meibom, A.** (2018). Temperature and feeding induce tissue level changes in autotrophic and heterotrophic nutrient allocation in the coral symbiosis - A NanoSIMS study. *Sci. Rep.* **8**, 12710.



- Laurent, J., Tambutté, S., Tambutté, É., Allemand, D. and Venn, A.** (2013). The influence of photosynthesis on host intracellular pH in scleractinian corals. *J. Exp. Biol.* **216**, 1398–1404.
- Leggat, W., Heron, S. F., Fordyce, A., Suggett, D. J. and Ainsworth, T. D.** (2022). Experiment Degree Heating Week (eDHW) as a novel metric to reconcile and validate past and future global coral bleaching studies. *J. Environ. Manage.* **301**, 113919.
- Lenth, R. and Lenth, M. R.** (2017). Package “emmeans.” *Statistician* **34**, 216–221.
- Levy, S., Elek, A., Grau-Bové, X., Menéndez-Bravo, S., Iglesias, M., Tanay, A., Mass, T. and Sebé-Pedrós, A.** (2021). A stony coral cell atlas illuminates the molecular and cellular basis of coral symbiosis, calcification, and immunity. *Cell* **184**, 2973–2987.e18.
- Madshus, I. H.** (1988). Regulation of intracellular pH in eukaryotic cells. *Biochem. J* **250**, 1–8.
- Malan, A., Wilson, T. L. and Reeves, R. B.** (1976). Intracellular pH in cold-blooded vertebrates as a function of body temperature. *Respir. Physiol.* **28**, 29–47.
- McFall-Ngai, M., Hadfield, M. G., Bosch, T. C. G., Carey, H. V., Domazet-Lošo, T., Douglas, A. E., Dubilier, N., Eberl, G., Fukami, T., Gilbert, S. F., et al.** (2013). Animals in a bacterial world, a new imperative for the life sciences. *Proc. Natl. Acad. Sci. U. S. A.* **110**, 3229–3236.
- Melzner, F., Podbielski, I., Mark, F. C. and Tresguerres, M.** (2022). The silent loss of cell physiology hampers marine biosciences. *PLoS Biol.* **20**, e3001641.
- Muscattine, L., Falkowski, P. G., Porter, J. W. and Dubinsky, Z.** (1984). Fate of photosynthetic fixed carbon in light- and shade-adapted colonies of the symbiotic coral *Stylophora pistillata*. *Proc. R. Soc. Lond.* **222**, 181–202.
- Nesa, B. and Hidaka, M.** (2009). High zooxanthella density shortens the survival time of coral cell aggregates under thermal stress. *J. Exp. Mar. Bio. Ecol.* **368**, 81–87.
- Oakley, C. A. and Davy, S. K.** (2018). Cell Biology of Coral Bleaching. In *Coral Bleaching: Patterns, Processes, Causes and Consequences* (ed. van Oppen, M. J. H.) and Lough, J. M.), pp. 189–211. Cham: Springer International Publishing.

- Oksanen, J., Blanchet, F. G., Kindt, R., Legendre, P., Minchin, P. R., O'hara, R. B., Simpson, G. L., Solymos, P., Stevens, M. H. H., Wagner, H., et al. (2013). Package "vegan." *Community ecology package, version 2*, 1–295.
- Pan, T.-C. F., Applebaum, S. L. and Manahan, D. T. (2015). Experimental ocean acidification alters the allocation of metabolic energy. *Proc. Natl. Acad. Sci. U. S. A.* **112**, 4696–4701.
- Pörtner, H. O., Peck, L., Zielinski, S. and Conway, L. Z. (1999). Intracellular pH and energy metabolism in the highly stenothermal Antarctic bivalve *Limopsis marionensis* as a function of ambient temperature. *Polar Biol.* **22**, 17–30.
- Putnam, H. M., Barott, K. L., Ainsworth, T. D. and Gates, R. D. (2017). The Vulnerability and Resilience of Reef-Building Corals. *Curr. Biol.* **27**, R528–R540.
- Rädecker, N., Raina, J.-B., Pernice, M., Perna, G., Guagliardo, P., Kilburn, M. R., Aranda, M. and Voolstra, C. R. (2018). Using *Aiptasia* as a Model to Study Metabolic Interactions in Cnidarian-Symbiodinium Symbioses. *Front. Physiol.* **9**, 214.
- Rädecker, N., Pogoreutz, C., Gegner, H. M., Cárdenas, A., Roth, F., Bougoure, J., Guagliardo, P., Wild, C., Pernice, M., Raina, J.-B., et al. (2021). Heat stress destabilizes symbiotic nutrient cycling in corals. *Proc. Natl. Acad. Sci. U. S. A.* **118**, e2022635118.
- Reeves, R. B. and Malan, A. (1976). Model studies of intracellular acid-base temperature responses in ectotherms. *Respir. Physiol.* **28**, 49–63.
- Ros, M., Camp, E. F., Hughes, D. J., Crosswell, J. R., Warner, M. E., Leggat, W. P. and Suggett, D. J. (2020). Unlocking the black- box of inorganic carbon- uptake and utilization strategies among coral endosymbionts (Symbiodiniaceae). *Limnol. Oceanogr.* **65**, 1747–1763.
- Smith, K. E., Burrows, M. T., Hobday, A. J., King, N. G., Moore, P. J., Sen Gupta, A., Thomsen, M. S., Wernberg, T. and Smale, D. A. (2023). Biological Impacts of Marine Heatwaves. *Ann. Rev. Mar. Sci.* **15**, 119–145.
- Sokolova, I. M., Frederich, M., Bagwe, R., Lannig, G. and Sukhotin, A. A. (2012). Energy homeostasis as an integrative tool for assessing limits of environmental stress tolerance in aquatic invertebrates. *Mar. Environ. Res.* **79**, 1–15.

- Strand, R., Whalan, S., Webster, N. S., Kutti, T., Fang, J. K. H., Luter, H. M. and Bannister, R. J.** (2017). The response of a boreal deep-sea sponge holobiont to acute thermal stress. *Sci. Rep.* **7**, 1660.
- Sunagawa, S., Wilson, E. C., Thaler, M., Smith, M. L., Caruso, C., Pringle, J. R., Weis, V. M., Medina, M. and Schwarz, J. A.** (2009). Generation and analysis of transcriptomic resources for a model system on the rise: the sea anemone *Aiptasia pallida* and its dinoflagellate endosymbiont. *BMC Genomics* **10**, 258.
- Toby Kiers, E., Palmer, T. M., Ives, A. R., Bruno, J. F. and Bronstein, J. L.** (2010). Mutualisms in a changing world: an evolutionary perspective. *Ecol. Lett.* **13**, 1459–1474.
- Tremblay, P., Gori, A., Maguer, J. F., Hoogenboom, M. and Ferrier-Pagès, C.** (2016). Heterotrophy promotes the re-establishment of photosynthate translocation in a symbiotic coral after heat stress. *Sci. Rep.* **6**, 38112.
- Tresguerres, M., Barott, K. L., Barron, M. E. and Roa, J. N.** (2014). Established and potential physiological roles of bicarbonate-sensing soluble adenylyl cyclase (sAC) in aquatic animals. *J. Exp. Biol.* **217**, 663–672.
- Tresguerres, M., Barott, K. L., Barron, M. E., Deheyn, D. D., Kline, D. I. and Linsmayer, L. B.** (2017). Cell Biology of Reef-Building Corals: Ion Transport, Acid/Base Regulation, and Energy Metabolism. In *Acid-Base Balance and Nitrogen Excretion in Invertebrates: Mechanisms and Strategies in Various Invertebrate Groups with Considerations of Challenges Caused by Ocean Acidification* (ed. Weihrauch, D.) and O'Donnell, M.), pp. 193–218. Cham: Springer International Publishing.
- Van Dijk, P. L., Hardewig, I. and Pörtner, H. O.** (1997). Temperature-dependent shift of pHi in fish white muscle: contributions of passive and active processes. *Am. J. Physiol.* **272**, R84–9.
- Van Oppen, M. J. H. and Gates, R. D.** (2006). Conservation genetics and the resilience of reef-building corals. *Mol. Ecol.* **15**, 3863–3883.
- Venn, A. A., Tambutté, E., Lotto, S., Zoccola, D., Allemand, D. and Tambutté, S.** (2009). Imaging intracellular pH in a reef coral and symbiotic anemone. *Proc. Natl. Acad. Sci. U. S. A.* **106**, 16574–16579.

- Wagner, T., Schliep, E. M., North, J. S., Kundel, H., Custer, C. A., Ruzich, J. K. and Hansen, G. J. A.** (2023). Predicting climate change impacts on poikilotherms using physiologically guided species abundance models. *Proc. Natl. Acad. Sci. U. S. A.* **120**, e2214199120.
- Weis, V. M., Davy, S. K., Hoegh-Guldberg, O., Rodriguez-Lanetty, M. and Pringle, J. R.** (2008). Cell biology in model systems as the key to understanding corals. *Trends Ecol. Evol.* **23**, 369–376.
- Wickham, H.** (2016). Programming with ggplot2. In *ggplot2: Elegant Graphics for Data Analysis* (ed. Wickham, H.), pp. 241–253. Cham: Springer International Publishing.
- Wood, S. N.** (2011). Fast stable restricted maximum likelihood and marginal likelihood estimation of semiparametric generalized linear models. *J. R. Stat. Soc. Series B Stat. Methodol.* **73**, 3–36.
- Wooldridge, S. A.** (2009). A new conceptual model for the warm-water breakdown of the coral–algae endosymbiosis. *Mar. Freshwater Res.* **60**, 483–496.
- Xiang, T., Lehnert, E., Jinkerson, R. E., Clowez, S., Kim, R. G., DeNofrio, J. C., Pringle, J. R. and Grossman, A. R.** (2020). Symbiont population control by host-symbiont metabolic interaction in Symbiodiniaceae-cnidarian associations. *Nat. Commun.* **11**, 108.
- Zhang, Z., Green, B. R. and Cavalier-Smith, T.** (2000). Phylogeny of ultra-rapidly evolving dinoflagellate chloroplast genes: a possible common origin for sporozoan and dinoflagellate plastids. *J. Mol. Evol.* **51**, 26–40.

## Figures and Tables

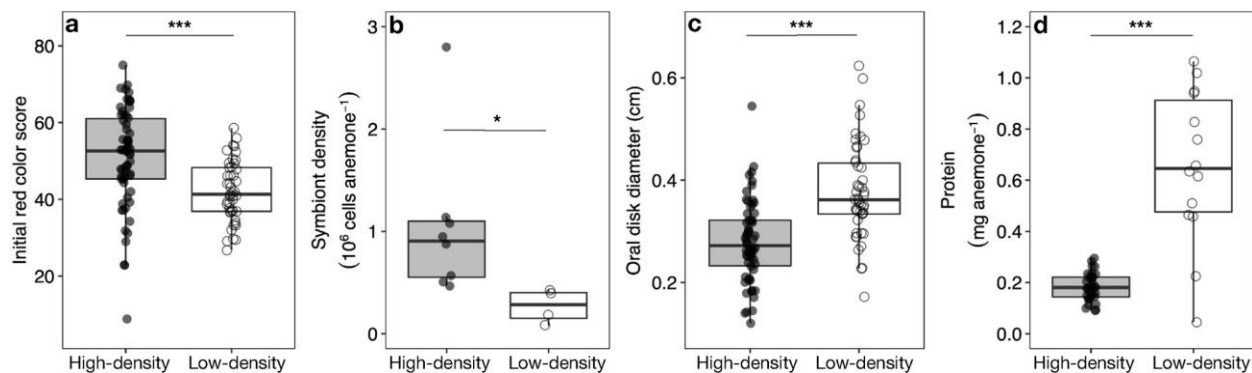

**Fig. 1. Symbiotic individuals from two cohorts of clonal *Exaiptasia diaphana* showed baseline differences in symbiont density, and body size. a)** Pre-treatment color scores (% red color) of symbiotic anemones differed by cohort (HD: N=61; LD: N=45). **b)** Symbiont cells per anemone at baseline incubation temperature (25°C) differed by cohort (HD: N=8; LD=N=4). **c)** Pre-treatment body size differed by cohort (HD: N=61; LD: N=45). **d)** Protein concentration differed by cohort (HD: N=32; LD: N=14). Points represent individual anemones. Boxplots show medians with 25th and 75th percentiles, and whiskers show 1.5x interquartile range. Asterisks show results from linear mixed effects models (**a,b,d**) with cohort as fixed effect and anemone container as a random effect (\*P<0.05, \*\*\*P<0.001), or linear regression with cohort as fixed effect (**c**; P<0.001).

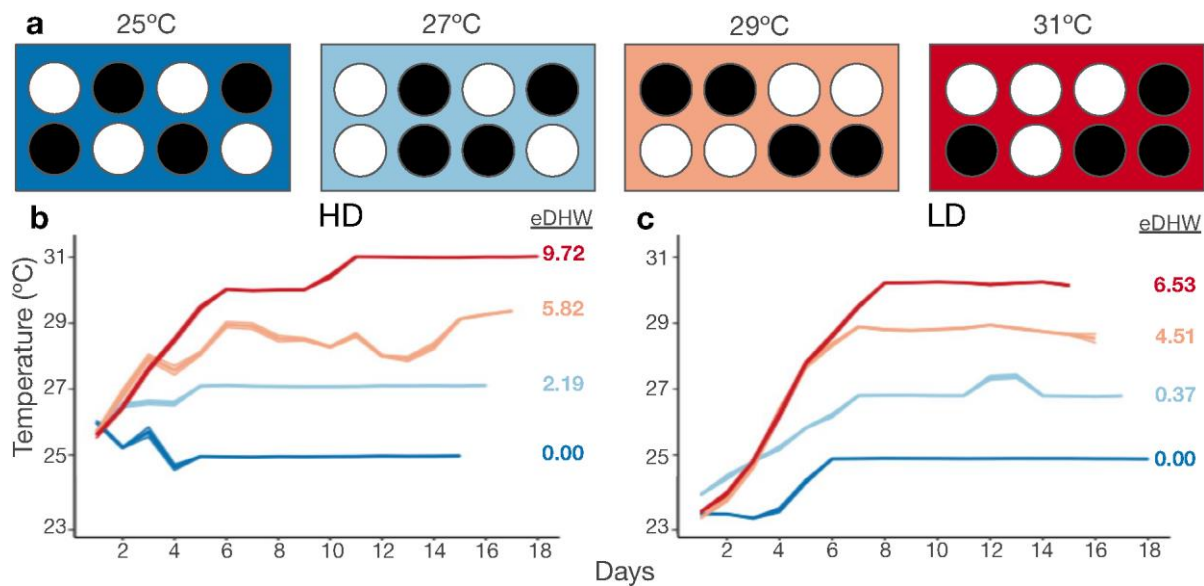

**Fig. 2. Experimental design and temperature conditions across the experimental period.** **a)** *Exaiptasia diaphana* were kept in separate containers (N=4 containers per treatment for each cohort; 3-4 anemones per container) within water baths held at 25, 27, 29, or 31°C. Circles represent randomly arranged containers within each water bath (dark: aposymbiotic containers; white: symbiotic containers). **b-c)** Daily average temperatures (24 hr mean) across containers within temperature treatments of the **(b)** high-symbiont-density (HD) and low-symbiont-density (LD) **(c)** cohorts. Ribbons indicate standard error. Seawater temperatures were significantly different by treatment within each cohort ( $P < 0.001$ ). Annotations to the right of each temperature graph indicate total accumulated experimental degree heating weeks (eDHW; °C week<sup>-1</sup>) for each treatment.



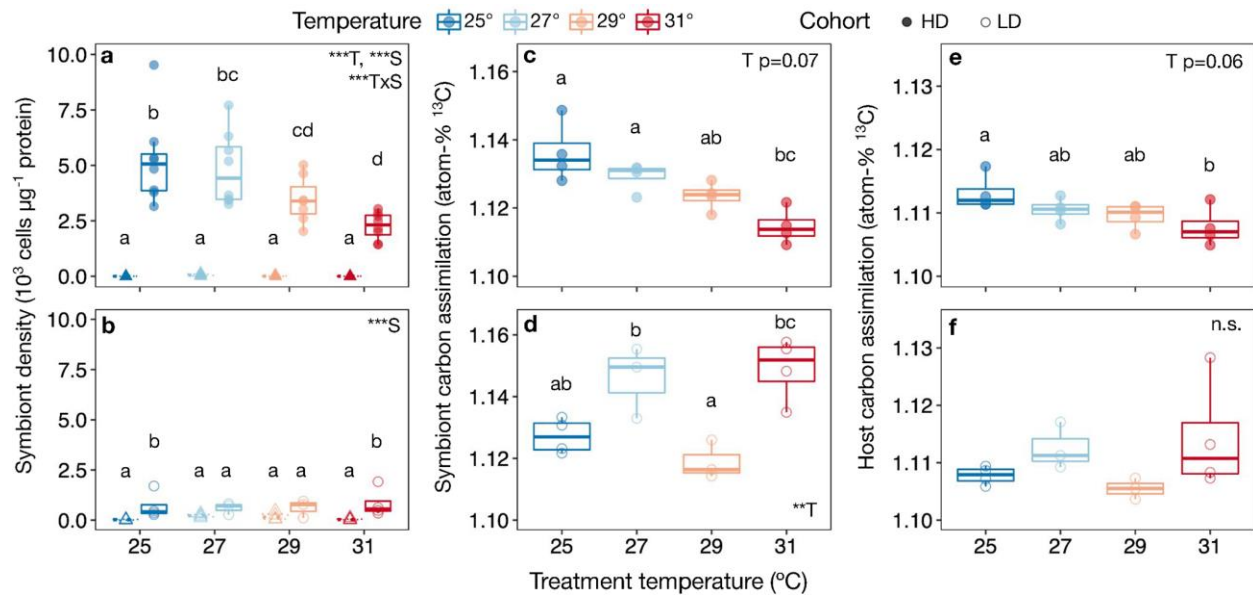

**Fig. 3. Temperature altered dinoflagellate density and symbiotic function in high-symbiont-density but not low-symbiont-density *Exaiptasia diaphana*. a-b)**

Symbiont density response to temperature density in symbiotic (sym, circles) and aposymbiotic (apo, triangles) individuals differed between high-symbiont-density (HD, N=8 per temperature) **(a)** and low-symbiont-density (LD, N=4 per temperature) **(b)** anemone cohorts. **c-f)** Temperature response of symbiont **(c-d)** and host **(e-f)** photosynthate assimilation (atom-% <sup>13</sup>C) differed between **(c, e)** high-symbiont-density and **(d, f)** low-symbiont-density anemones (N=4 per temperature). Points represent individual anemones. Boxplots show medians with 25th and 75th percentiles, and whiskers show 1.5x interquartile range. Insets show results of linear models with effects of temperature (T), symbiotic status (S), and their interactions (\*P<0.05, \*\*P<0.01, \*\*\*P<0.001). Small letters denote significant pairwise groupings (P<0.05) (Tukey's HSD).

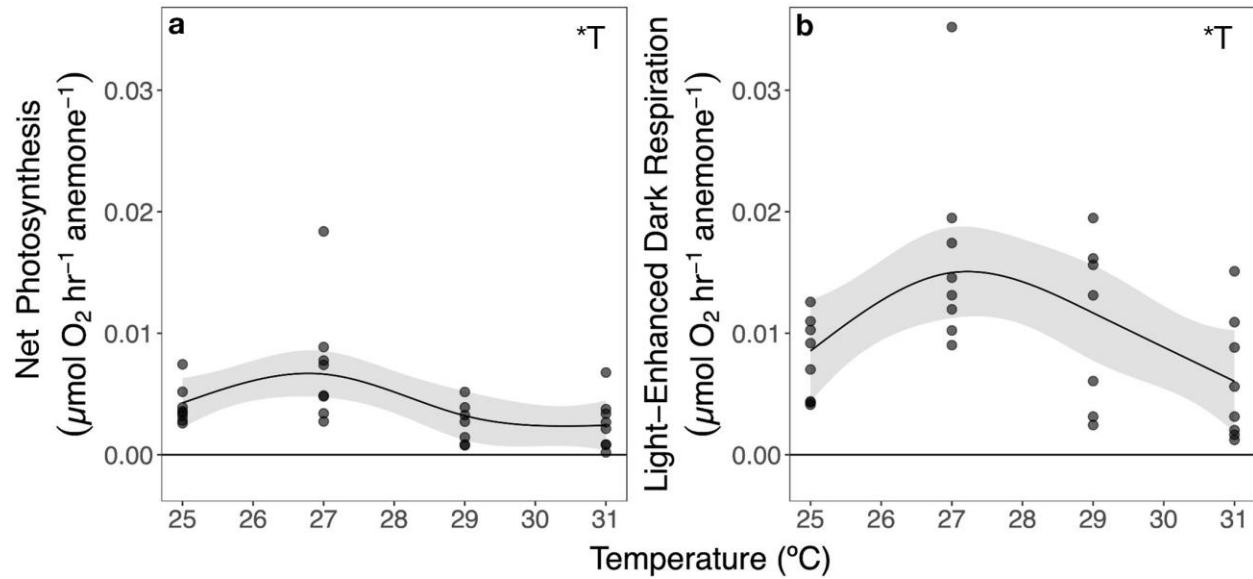

**Fig. 4. *Exaiptasia diaphana* metabolic rates vary with temperature.** Estimated maximum net photosynthesis **(a)** and light-enhanced dark respiration **(b)** of high-symbiont-density symbiotic anemones after incubation at treatment temperatures. Points in **(a)** represent generalized additive model-estimated net photosynthetic rates for individual anemones and points in **(b)** represent actual measured dark oxygen evolution rates for individual anemones. N=8 anemones per temperature. Lines indicate metabolic rates predicted by generalized additive models for temperature (T) (gray ribbon = 95% confidence interval), with insets indicating significant effects (\*P<0.05).

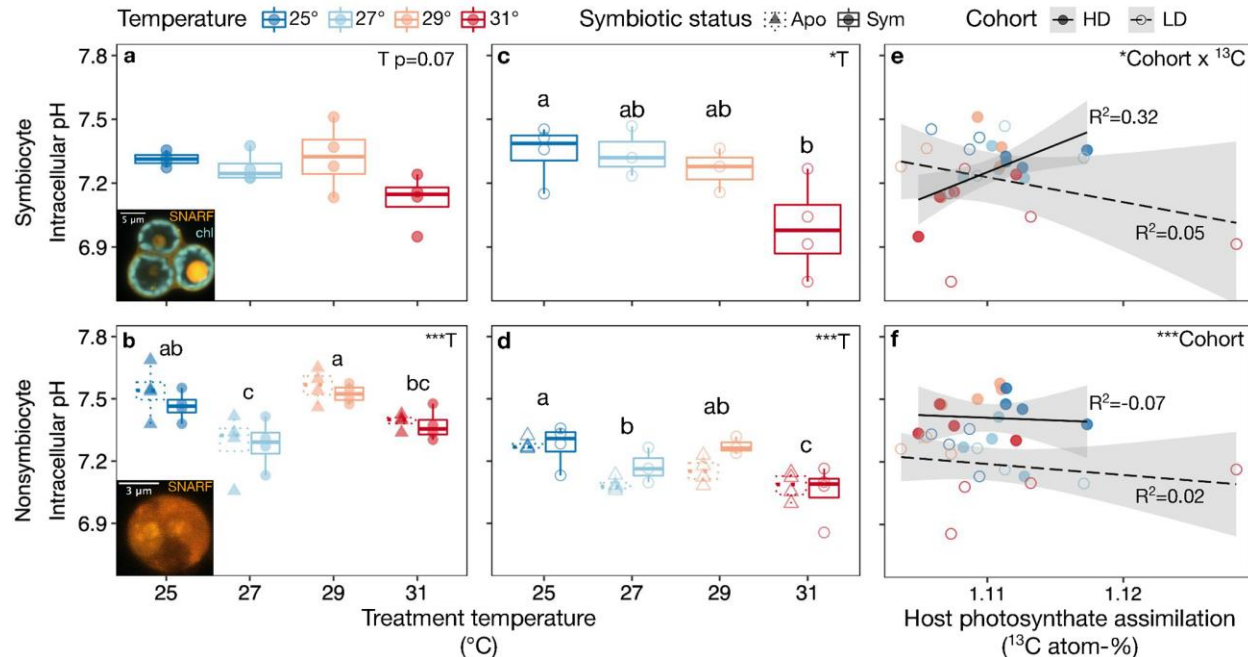

**Fig. 5. Heat altered *Exaiptasia diaphana* intracellular pH (pHi) regardless of symbiont presence, density, or mutualistic function. a-b)** pHi of high-symbiont-density (HD) *E. diaphana* symbiocytes (a) and non-symbiocytes (b) varied with temperature. Insets, symbiocyte (a) and non-symbiocyte (b) showing fluorescence of pH-sensitive dye (SNARF-1) and symbiont chlorophyll (chl). **c-d)** pHi of low-symbiont-density (LD) *E. diaphana* symbiocytes (c) and non-symbiocytes (d) decreased with temperature. Inset capital letters show results of linear models with effects of temperature (T); best-fit models found no effect of anemone symbiotic status in non-symbiocytes (symbiotic = Sym, circles; aposymbiotic = Apo, triangles). Small letters denote significant pairwise groupings ( $P<0.05$ ) (Tukey's HSD). Points represent individual anemones. Boxplots show medians with 25th and 75th percentiles, and whiskers show 1.5x interquartile range. **e)** In HD anemones, host photosynthate assimilation was correlated with symbiocyte pHi. In LD anemones, there was no correlation. **f)** Host photosynthate assimilation did not affect non-symbiocyte pHi in HD or LD anemones. Points show individual anemones. Regression lines show linear models with effects of host photosynthate assimilation ( $^{13}\text{C}$ ), cohort, and their interaction; gray band represents 95% confidence interval; and insets show results of linear models (\* $P<0.05$ , \*\*\* $P<0.001$ ). Each point shows median pH of all cells from individual anemones (N=4 symbiotic + 4 aposymbiotic anemones per temperature).

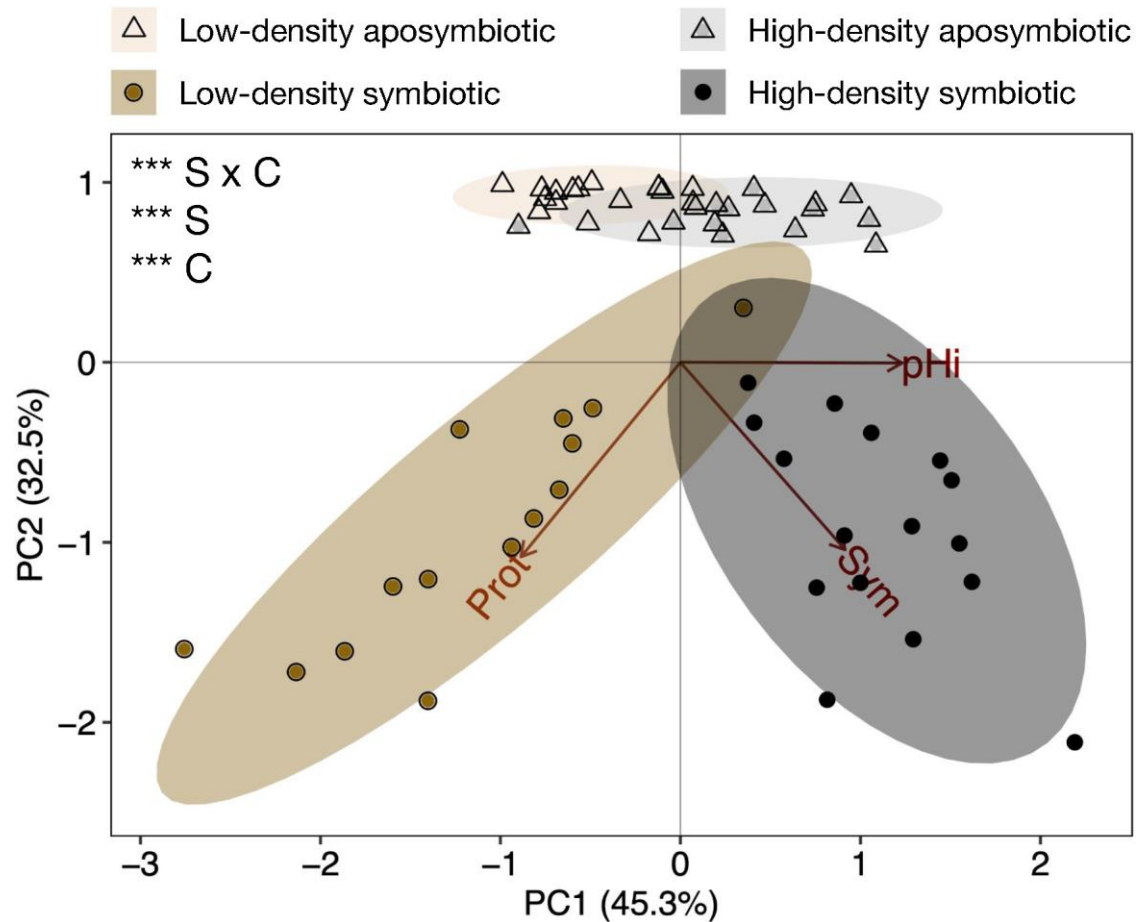

**Fig. 6. *Exaiptasia diaphana* physiology differed by degree of symbiont colonization.** Simplified principal components analysis for variables shared across all experimental replicates (Prot = protein, Sym = symbiont density, and pH<sub>i</sub> = nonsymbiocyte intracellular pH) grouped by cohort and symbiotic status. Insets show significant PERMANOVA effects of cohort (C), symbiotic status (S), and their interaction (S x C) (\*\*\*P<0.001). Ellipses show 95% confidence intervals for symbiotic status x cohort groupings. Points show individual anemones.

**Table 1. Experimental temperature treatments.** SE, standard error; eDHW, experimental degree heating week.

| <b>Cohort</b>         | <b>Target temperature (°C)</b> | <b>Mean temperature (°C ± SE)</b> | <b>Total eDHW (°C week<sup>-1</sup>)</b> | <b>Light intensity (μmol m<sup>-2</sup> sec<sup>-1</sup>)</b> |
|-----------------------|--------------------------------|-----------------------------------|------------------------------------------|---------------------------------------------------------------|
| High-symbiont-density | 25                             | 25.0 ± 0.1                        | 0.00                                     | 175                                                           |
|                       | 27                             | 27.1 ± 0.1                        | 2.19                                     | 160                                                           |
|                       | 29                             | 28.7 ± 0.1                        | 5.82                                     | 175                                                           |
|                       | 31                             | 30.7 ± 0.1                        | 9.72                                     | 165                                                           |
| Low-symbiont-density  | 25                             | 24.9 ± 0.1                        | 0.00                                     | 160                                                           |
|                       | 27                             | 26.9 ± 0.1                        | 0.37                                     | 165                                                           |
|                       | 29                             | 28.8 ± 0.1                        | 4.51                                     | 175                                                           |
|                       | 31                             | 30.2 ± 0.1                        | 6.53                                     | 175                                                           |

## SUPPLEMENTAL METHODS

### *Intracellular pH quantification*

During imaging, cells were chosen for imaging based on two predetermined visual assessments: (1) sufficient SNARF-1 loading in the cell (i.e. strong yellow/orange fluorescence) and (2) perceived cellular health (i.e. lack of membrane blebbing). All suspensions were imaged between 30-90 minutes following that anemone's cell isolation, as the majority of cells in suspension were observed to die after this time.

All confocal images were analyzed in ImageJ (Abramoff et al. 2004). Cells contained in micrograph images were visually scored for membrane integrity based on their cellular smoothness, and only high-confidence healthy cells were selected for analysis. After selection, a region of interest was drawn within each coral cell's host cytoplasm that excluded any part of the acidic symbiosome or alga. The mean pixel intensity of this region was then quantified in the red ( $640 \pm 15$  nm) and yellow ( $585 \pm 15$  nm) channels. This process was repeated for each cell in the image. A background region in the same image was then selected to completely exclude any cells, and its mean pixel intensity was quantified in the red and yellow channels. Background mean pixel intensity in each channel was then subtracted from the mean pixel intensity in each channel of the cellular region(s) to obtain each cell's (i.e., cell 1 red channel intensity - background red channel intensity = cell 1 red fluorescence).

A calibration curve using cells of known pH was constructed to convert all cells' ratios of red and yellow fluorescence intensities to pH. Briefly, *E. diaphana* cells were isolated and incubated with SNARF-1AM in the same manner as for experimental animals (main text Methods). Cells were then spun down and resuspended in a calibration buffers of standardized pH and osmolarity (Venn et al. 2009) with  $30\mu\text{M}$  nigericin (Invitrogen, Thermo Fisher Scientific), and incubated for 5-10 mins to permeabilize the membrane and allow them to equilibrate with the surrounding pH prior to imaging. At least 10 symbiocytes and 10 non-symbiocytes were imaged per pH point. This was repeated for six different pH values (pH 6, 6.5, 7, 7.5, 8, or 8.5). Fluorescence ratios were related to solution pH by linear regression (Fig. S1a). For experimental cells, fluorescence ratios were converted to pH using the following equation:

$$\text{pH} = \text{pK}_A - \log_{10}[(R-R_B)/(R_A-R)*(F_B/F_A)]$$

where  $R_A$  = calibration cells' 585nm/640nm fluorescence ratio at pH 8.5,  $R_B$  = calibration cells' 585nm/640nm fluorescence ratio at 6,  $F_B$  = calibration cells' 640nm fluorescence intensity at pH 8.5,  $F_A$  = calibration cells' 640nm fluorescence intensity at pH 6, and  $\text{pK}_A$  = x-intercept obtained from plotting the calibration curve's fluorescence logarithmic term against solution pH (Fig. 1b).

## SUPPLEMENTAL METHODS REFERENCES

**Abramoff, Magalhães, P. J. and Ram, S. J.** (2004). Image processing with ImageJ.  
*Biophotonics Int.* **11**, 36–42.

**Venn, A. A., Tambutté, E., Lotto, S., Zoccola, D., Allemand, D. and Tambutté, S.** (2009).  
Imaging intracellular pH in a reef coral and symbiotic anemone. *Proc. Natl. Acad. Sci.*  
*U. S. A.* **106**, 16574–16579.



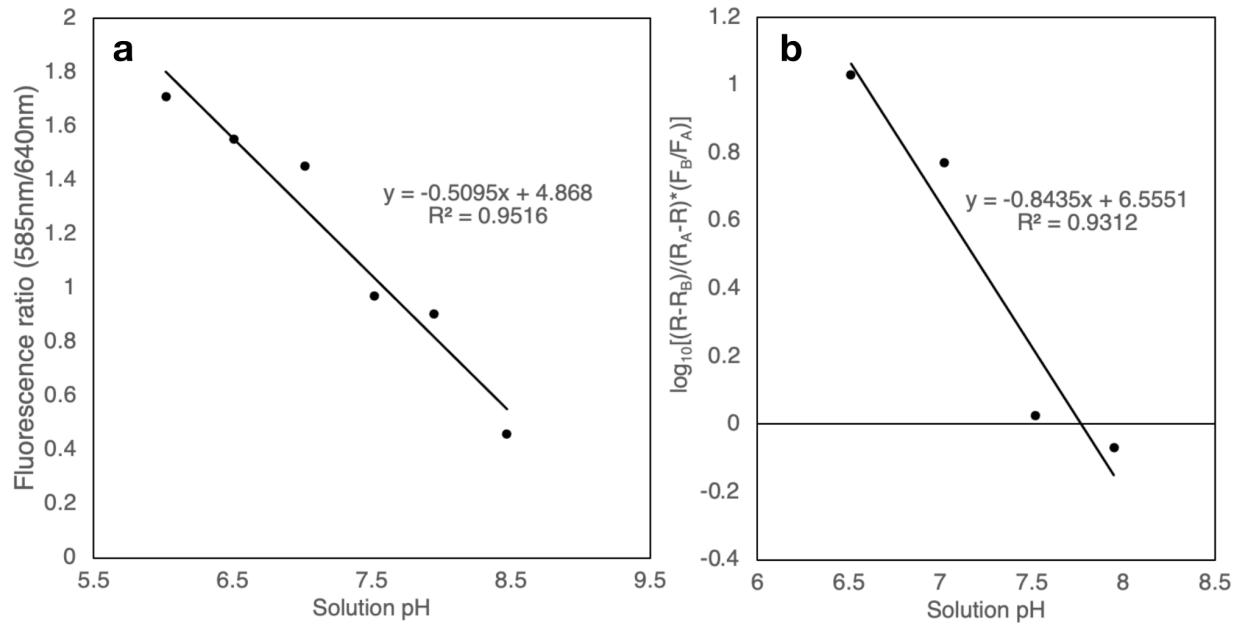

**Fig. S1. *In vivo* calibration of the pH-sensitive dye SNARF1 in *Exaiptasia diaphana* cells.**

**a)** Inverse correlation between calibration solution pH and ratio (R) of SNARF1 fluorescence intensity at  $585 \pm 15$  nm to  $640 \pm 15$  nm. **b)** R was related to pH using the following equation:  $\text{pH} = \text{pK}_A - \log_{10}[(R-R_B)/(R_A-R)*(F_B/F_A)]$  where  $R_A$  = 585nm/640nm fluorescence ratio at pH 8.5,  $R_B$  = 585nm/640nm fluorescence ratio at 6,  $F_B$  = 640nm fluorescence intensity at pH 8.5,  $F_A$  = 640nm fluorescence intensity at pH 6, and  $\text{pK}_A$  = x-intercept obtained from plotting the standard's logarithmic term against solution pH (shown). Each point represents  $N \geq 10$  individual cells.

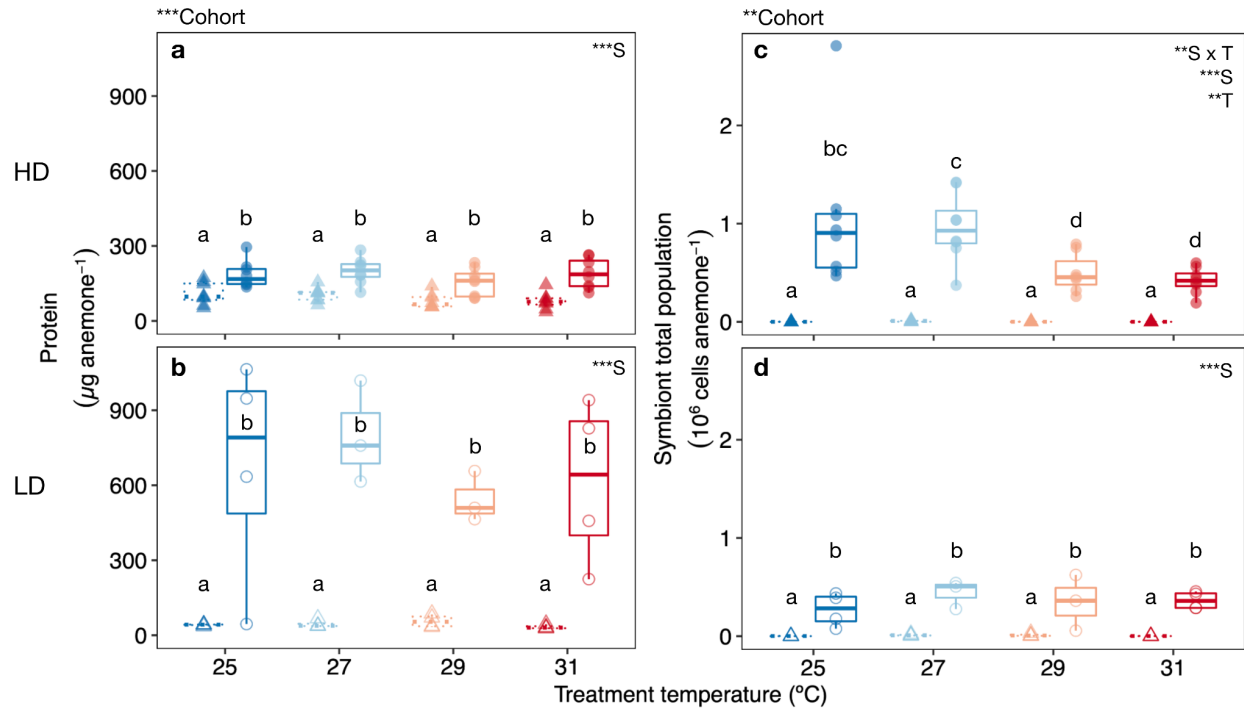

**Fig. S2. Experimental cohorts differed in symbiotic *Exaiptasia diaphana* biomass and symbiont density.** **a-b)** Total protein per animal in high-symbiont-density (HD) (**a**) and low-symbiont-density (LD) (**b**) cohorts. **c-d)** Total symbiont cells per animal in HD (**c**) and LD (**d**) cohorts. Superset annotations indicate results of linear models with effects of temperature (not significant) and cohort comparing symbiotic animals only. Inset capital letters show result of linear models with effects of temperature (T), symbiotic status (S), and their interactions (\*\*p < 0.001) within each cohort. Small letters denote significant pairwise groupings (p < 0.05) (Tukey's HSD). Each point represents an average of 3 technical replicates from one individual anemones.

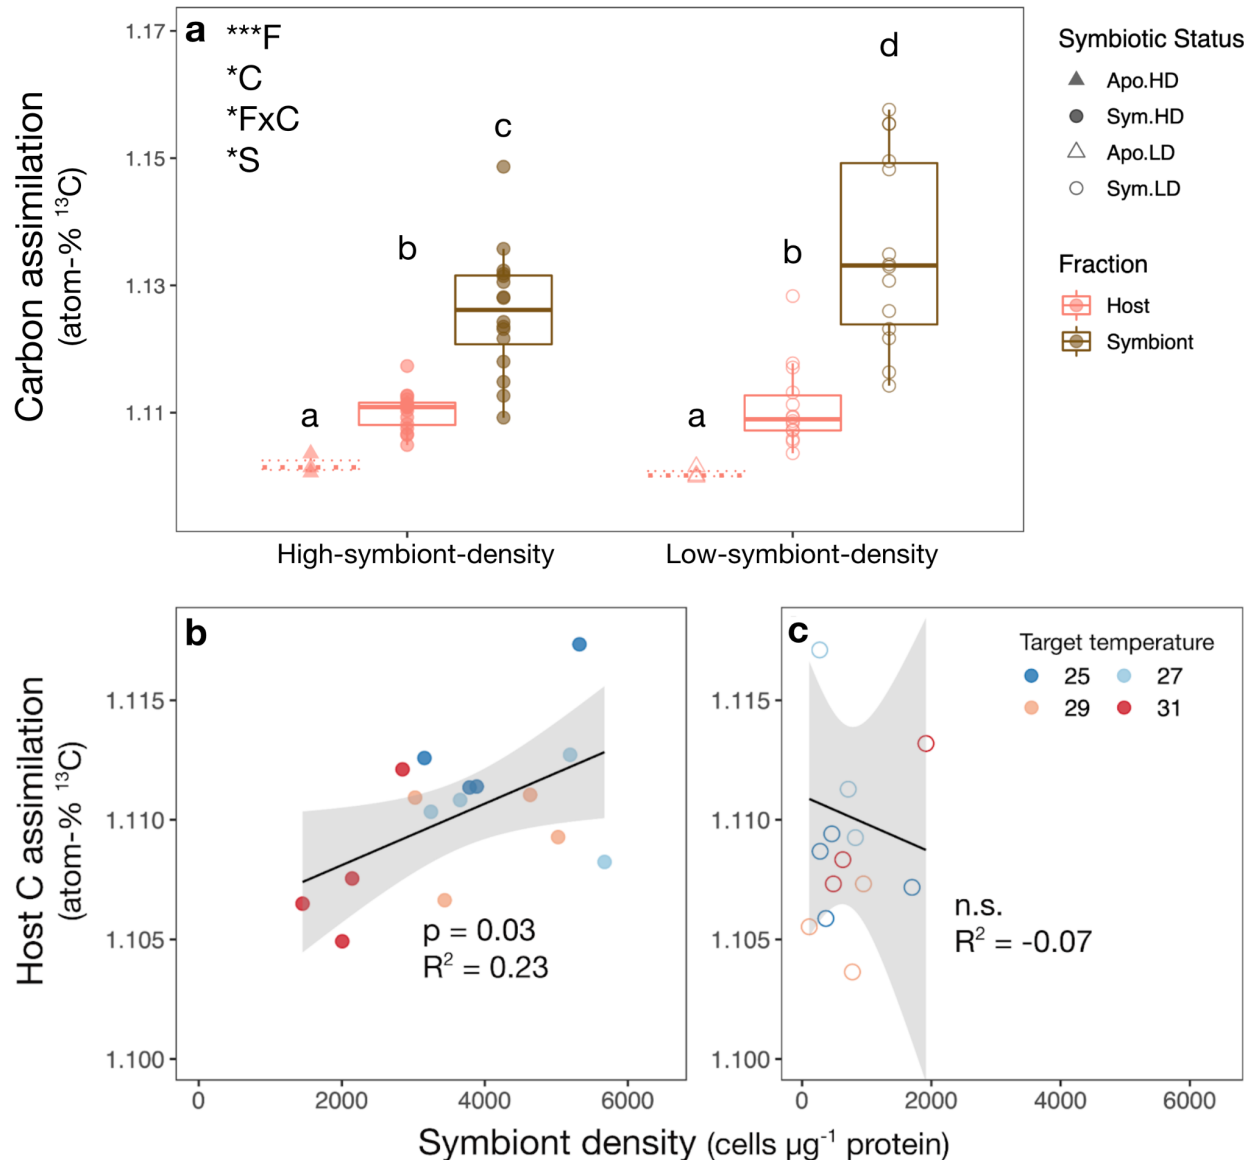

**Fig. S3. *Exaiptasia diaphana* photosynthate assimilation depended on initial symbiont density.** (a)  $^{13}\text{C}$  isotope pulse-chase significantly enriched  $^{13}\text{C}$  in symbiotic host (pink) and symbiont (brown) fractions from both high-symbiont-density (filled circles) and low-symbiont-density (open circles) *Exaiptasia diaphana* relative to aposymbiotic anemones (triangles). Inset capital letters show result of linear model with effects of fraction (F), cohort (C), symbiotic status (S), and their interactions (\* $p < 0.05$ , \*\*\* $p < 0.001$ ). Small letters denote significant pairwise groupings ( $p < 0.05$ ) (Tukey's HSD). (b) In the high-symbiont-density cohort, post-treatment host  $^{13}\text{C}$  assimilation was positively correlated with symbiont density (linear model,  $\text{df}=1$ ,  $f=5.54$ ,  $p=0.03$ ). (c) There was no relationship between host photosynthate assimilation and symbiont density in the low-symbiont-density cohort (linear model,  $\text{df}=1$ ,  $f=0.12$ ,  $p=0.73$ ). Points represent individual anemones.

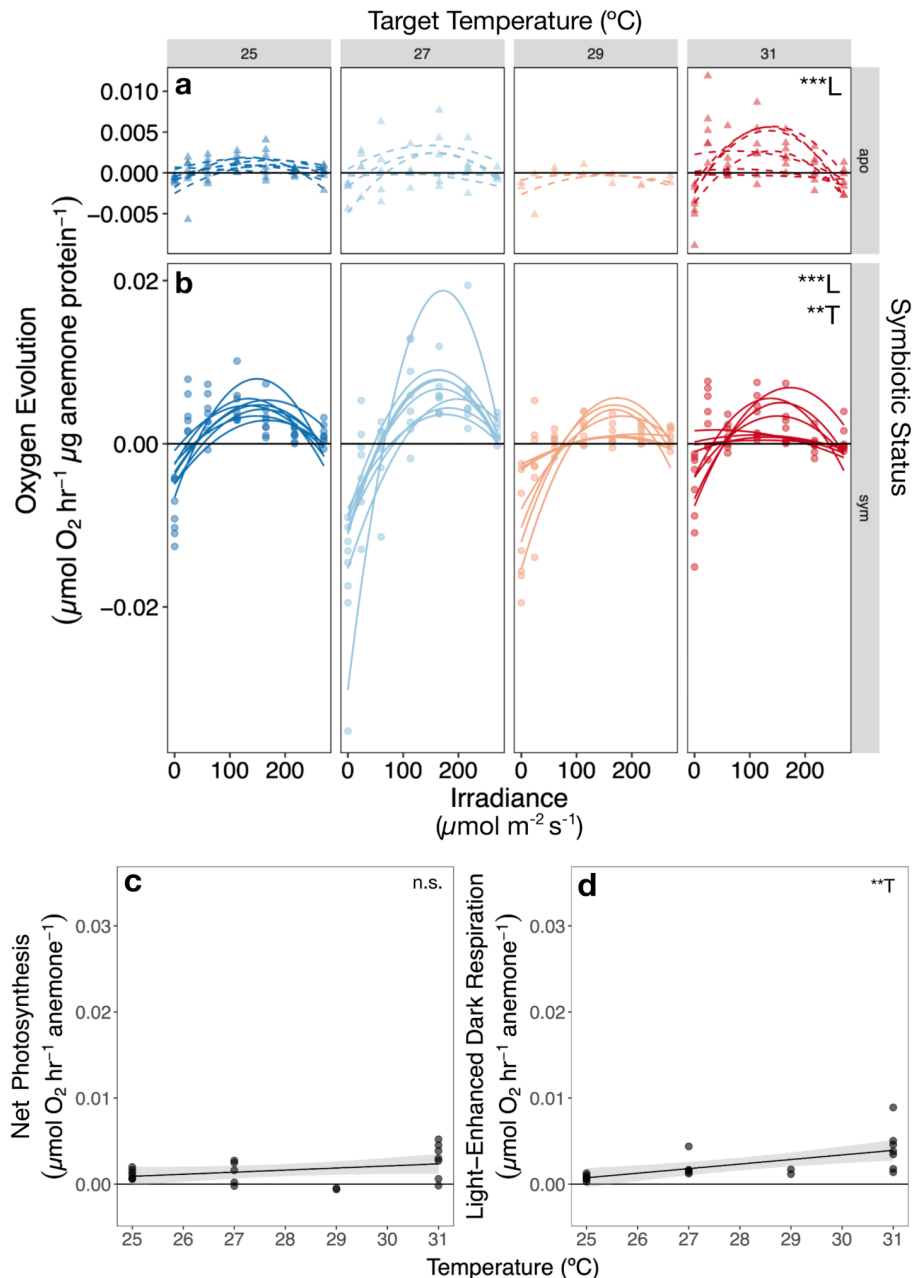

**Fig. S4. Metabolic rates of aposymbiotic (a, c-d) and high-symbiont-density (b) *Exaiptasia diaphana* across treatment temperatures.** Inset capital letters show effect of irradiance (L) on oxygen evolution in both aposymbiotic (a, triangles with dotted lines; edf=5.72,  $f=6.88$ ,  $p<0.001$ ) and symbiotic anemones (b, circles with solid lines; edf=5.90,  $f=40.2$ ,  $p<0.001$ ), but effect of temperature (T) only in symbiotic anemones (b;  $t=-2.849$ ,  $p=0.005$ ) (generalized additive models (GAMs) for irradiance with temperature as a factor,  $k=7$ ). **c-d**) Estimated maximum net photosynthetic (c) and light-enhanced dark respiration (d) rates of aposymbiotic anemones across treatment temperatures. Points in (a) represent generalized additive model-estimated maximum net photosynthetic rates for individual anemones and points in (b) represent actual measured dark oxygen evolution rates for individual anemones. Lines show metabolic rates predicted by best-fit linear models for temperature (T) (gray ribbon = SE).

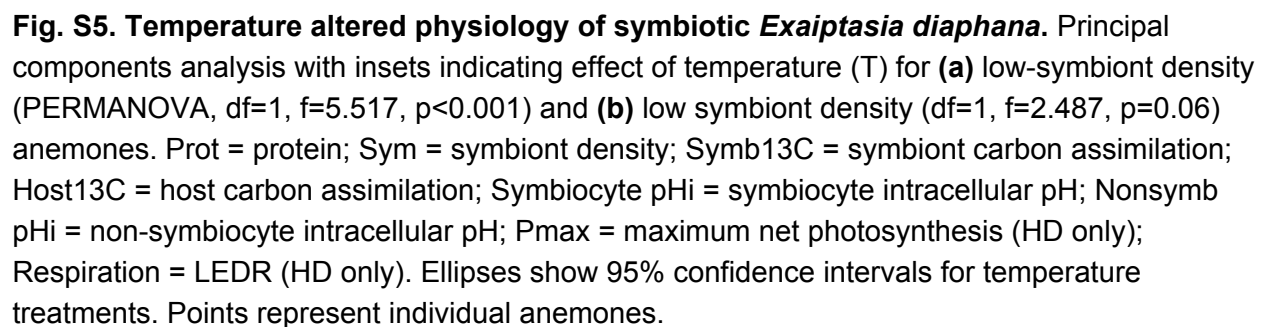

**Table S1.** Symbiodiniaceae genotyping results. Asterisk indicates the PCR product was used to confirm primer specificity by Sanger sequencing.

|        |         | Primer set 1<br>( <i>S. linuche</i> ) |                             | Primer set 2<br>( <i>B. minutum</i> ) |
|--------|---------|---------------------------------------|-----------------------------|---------------------------------------|
| Cohort | Anemone | Amplification                         | Species confirmed by digest | Amplification                         |
| HD     | 17      | Y*                                    | <i>S. linuche</i>           | Y*                                    |
| HD     | 18      | Y                                     | <i>S. linuche</i>           | Y                                     |
| HD     | 19      | Y                                     | <i>S. linuche</i>           | Y                                     |
| HD     | 20      | Y                                     | <i>S. linuche</i>           | Y                                     |
| HD     | 21      | Y                                     | <i>S. linuche</i>           | Y                                     |
| HD     | 22      | N                                     | N/A                         | N                                     |
| HD     | 23      | Y*                                    | <i>S. linuche</i>           | Y*                                    |
| HD     | 24      | Y                                     | N/A                         | Y                                     |
| HD     | 25      | Y                                     | N/A                         | Y                                     |
| HD     | 26      | Y                                     | N/A                         | Y                                     |
| HD     | 27      | Y                                     | <i>S. linuche</i>           | Y                                     |
| HD     | 28      | Y                                     | N/A                         | Y                                     |
| HD     | 29      | Y                                     | N/A                         | Y                                     |
| HD     | 30      | Y                                     | N/A                         | Y                                     |
| HD     | 31      | Y                                     | N/A                         | Y                                     |
| HD     | 32      | N                                     | N/A                         | N                                     |
| LD     | 1       | Y                                     | <i>S. linuche</i>           | Y                                     |
| LD     | 2       | Y                                     | <i>S. linuche</i>           | Y                                     |
| LD     | 6       | Y*                                    | <i>S. linuche</i>           | Y*                                    |
| LD     | 8       | Y                                     | <i>S. linuche</i>           | Y                                     |
| LD     | 10      | Y                                     | <i>S. linuche</i>           | Y                                     |
| LD     | 13      | Y                                     | <i>S. linuche</i>           | Y                                     |
| LD     | 16      | Y                                     | <i>S. linuche</i>           | Y                                     |
| LD     | 18      | Y                                     | <i>S. linuche</i>           | Y                                     |
| LD     | 19      | Y                                     | <i>S. linuche</i>           | Y                                     |
| LD     | 20      | Y                                     | <i>S. linuche</i>           | Y                                     |
| LD     | 21      | Y                                     | <i>S. linuche</i>           | Y                                     |
| LD     | 30      | Y                                     | N/A                         | Y                                     |
| LD     | 31      | N                                     | N/A                         | N                                     |

**Table S2.** Statistical models chosen by lowest AICc (*MuMIn* package).

|                                    | Model                      | Response variable                                                                                            | Data subset                                                 | Fixed effects                                                           | Random effects    |
|------------------------------------|----------------------------|--------------------------------------------------------------------------------------------------------------|-------------------------------------------------------------|-------------------------------------------------------------------------|-------------------|
| <b>Temperature</b>                 | Linear model               | Hourly temperature (°C)                                                                                      | HD cohort post-ramp                                         | Temperature treatment                                                   | NA                |
|                                    | Linear model               | Hourly temperature (°C)                                                                                      | LD cohort post-ramp                                         | Temperature treatment                                                   | NA                |
|                                    | Linear model               | Hourly temperature (°C)                                                                                      | Post-ramp                                                   | Temperature treatment, Cohort                                           | NA                |
| <b>Respirometry</b>                | Linear model               | Oxygen evolution ( $\mu\text{mol O}_2 \text{ min}^{-1} \text{ L}^{-1} \mu\text{g}^{-1}$ protein)             | N/A                                                         | Symbiotic Status, Light Level ( $\mu\text{mol m}^{-2} \text{ s}^{-1}$ ) | NA                |
|                                    | Generalized additive model | Oxygen evolution ( $\mu\text{mol O}_2 \text{ min}^{-1} \text{ L}^{-1} \mu\text{g}^{-1}$ protein)             | Symbiotic anemones                                          | Light Level ( $\mu\text{mol m}^{-2} \text{ s}^{-1}$ ), Temperature (°C) | NA                |
|                                    | Generalized additive model | Oxygen evolution ( $\mu\text{mol O}_2 \text{ min}^{-1} \text{ L}^{-1} \mu\text{g}^{-1}$ protein)             | Aposymbiotic anemones                                       | Light Level ( $\mu\text{mol m}^{-2} \text{ s}^{-1}$ )                   | NA                |
|                                    | Generalized additive model | Estimated maximum photosynthesis ( $\mu\text{mol O}_2 \text{ min}^{-1} \text{ L}^{-1} \mu\text{g protein}$ ) | Symbiotic anemones                                          | Temperature (°C)                                                        | Anemone container |
|                                    | Generalized additive model | Light-enhanced dark respiration ( $\mu\text{mol O}_2 \text{ min}^{-1} \text{ L}^{-1} \mu\text{g protein}$ )  | Symbiotic anemones                                          | Temperature (°C)                                                        | NA                |
|                                    | Linear regression          | Estimated maximum photosynthesis ( $\mu\text{mol O}_2 \text{ min}^{-1} \text{ L}^{-1} \mu\text{g protein}$ ) | Aposymbiotic anemones                                       | Temperature (°C)                                                        | NA                |
|                                    | Linear regression          | Light-enhanced dark respiration ( $\mu\text{mol O}_2 \text{ min}^{-1} \text{ L}^{-1} \mu\text{g protein}$ )  | Aposymbiotic anemones                                       | Temperature (°C)                                                        | NA                |
| <b>Cohort baseline differences</b> | Linear mixed effects model | Red color score (% intensity)                                                                                | Symbiotic anemones at the start of each experimental period | Cohort                                                                  | Anemone container |
|                                    | Linear mixed effects model | Symbiont density (cells anemone <sup>-1</sup> )                                                              | Symbiotic anemones from                                     | Cohort                                                                  | Anemone container |



|                                                   |                            |                                                               |                                                             |                                         |                   |
|---------------------------------------------------|----------------------------|---------------------------------------------------------------|-------------------------------------------------------------|-----------------------------------------|-------------------|
|                                                   |                            |                                                               | 25°C control groups                                         |                                         |                   |
|                                                   | Linear mixed effects model | Protein (mg anemone <sup>-1</sup> )                           | Symbiotic anemones                                          | Cohort                                  | Anemone container |
|                                                   | Linear model               | <sup>13</sup> C assimilation (atom-% <sup>13</sup> C)         | Symbiotic anemones + 6 wild type aposymbiotic controls      | Cohort, Symbiont Status, Fraction       | NA                |
|                                                   | Linear model               | Size (oral disk diameter)                                     | Symbiotic anemones at the start of each experimental period | Cohort                                  | NA                |
| <b>Organismal physiology temperature response</b> | Linear model               | Protein (µg anemone <sup>-1</sup> )                           | HD cohort                                                   | Temperature treatment, Symbiotic status | NA                |
|                                                   | Linear mixed effects model | Symbiont density (cells µg protein <sup>-1</sup> )            | HD cohort                                                   | Temperature treatment, Symbiotic status | Anemone container |
|                                                   | Linear mixed effects model | Symbiont density (cells anemone <sup>-1</sup> )               | HD cohort                                                   | Temperature treatment, Symbiotic status | Anemone container |
|                                                   | Linear model               | Symbiont <sup>13</sup> C assimilation(atom-% <sup>13</sup> C) | HD cohort                                                   | Temperature treatment                   | NA                |
|                                                   | Linear model               | Host <sup>13</sup> C assimilation (atom-% <sup>13</sup> C)    | HD cohort                                                   | Temperature treatment                   | NA                |
|                                                   | Linear model               | Protein (µg anemone <sup>-1</sup> )                           | LD cohort                                                   | Temperature treatment, Symbiotic status | NA                |
|                                                   | Linear model               | Symbiont density (cells µg protein <sup>-1</sup> )            | LD cohort                                                   | Temperature treatment, Symbiotic status | NA                |
|                                                   | Linear model               | Symbiont density (cells anemone <sup>-1</sup> )               | LD cohort                                                   | Symbiotic status                        | NA                |
|                                                   |                            |                                                               |                                                             |                                         |                   |

|                                              |                   |                                                                 |                    |                                                                     |    |
|----------------------------------------------|-------------------|-----------------------------------------------------------------|--------------------|---------------------------------------------------------------------|----|
|                                              | Linear model      | Symbiont $^{13}\text{C}$ assimilation (atom-% $^{13}\text{C}$ ) | LD cohort          | Temperature treatment                                               | NA |
|                                              | Linear model      | Host $^{13}\text{C}$ assimilation (atom-% $^{13}\text{C}$ )     | LD cohort          | Temperature treatment                                               | NA |
| <b>Intracellular pH temperature response</b> | Linear model      | Symbiocyte intracellular pH                                     | HD cohort          | Temperature                                                         | NA |
|                                              | Linear model      | Nonsymbiocyte intracellular pH                                  | HD cohort          | Temperature                                                         | NA |
|                                              | Linear model      | Symbiocyte intracellular pH                                     | LD cohort          | Temperature, Symbiont Status                                        | NA |
|                                              | Linear model      | Nonsymbiocyte intracellular pH                                  | LD cohort          | Temperature                                                         | NA |
|                                              | Linear regression | Symbiocyte $\text{pH}_i$                                        | Symbiotic anemones | Host $^{13}\text{C}$ assimilation (atom-% $^{13}\text{C}$ ), Cohort | NA |
|                                              | Linear regression | Nonsymbiocyte $\text{pH}_i$                                     | NA                 | Host $^{13}\text{C}$ assimilation (atom-% $^{13}\text{C}$ ), Cohort | NA |
